# Supplementary material
Source: publisher site journal article supplement (https://www.spandidos-publications.com/6278/downloadSupplementary)
Supplement: Supplementary file 1 [file downloadSupplementary]

## Sheet: Sheet1
Table SIII. Cluster analysis: The proteins detected in plasma exosomes of HCC (C) and benign liver disease patients (N) patients were analyzed by cluster analysis, and the proteins with statistically significant differences and binding function.
GO:0038024	cargo receptor activity	6 of 206 in the list	6 of 386 in all the Protein	0.0223218	sp|P04004|VTNC_HUMAN,sp|A1L4H1|SRCRL_HUMAN,sp|Q08380|LG3BP_HUMAN,sp|Q07954|LRP1_HUMAN,sp|O43866|CD5L_HUMAN,sp|P05156|CFAI_HUMAN
GO:0004298	threonine-type endopeptidase activity	12 of 206 in the list	15 of 386 in all the Protein	0.0297573	sp|P49720|PSB3_HUMAN,sp|O14818|PSA7_HUMAN,sp|P20618|PSB1_HUMAN,sp|P25786|PSA1_HUMAN,sp|P28070|PSB4_HUMAN,sp|P28065|PSB9_HUMAN,sp|P60900|PSA6_HUMAN,sp|P25789|PSA4_HUMAN,sp|P28066|PSA5_HUMAN,sp|P25787|PSA2_HUMAN,sp|P28074|PSB5_HUMAN,sp|P49721|PSB2_HUMAN
GO:0070003	threonine-type peptidase activity	12 of 206 in the list	15 of 386 in all the Protein	0.0297573	sp|P49720|PSB3_HUMAN,sp|O14818|PSA7_HUMAN,sp|P20618|PSB1_HUMAN,sp|P25786|PSA1_HUMAN,sp|P28070|PSB4_HUMAN,sp|P28065|PSB9_HUMAN,sp|P60900|PSA6_HUMAN,sp|P25789|PSA4_HUMAN,sp|P28066|PSA5_HUMAN,sp|P25787|PSA2_HUMAN,sp|P28074|PSB5_HUMAN,sp|P49721|PSB2_HUMAN
GO:0000988	protein binding transcription factor activity	5 of 206 in the list	5 of 386 in all the Protein	0.0423114	sp|Q14192|FHL2_HUMAN,sp|Q06546|GABPA_HUMAN,sp|Q15645|PCH2_HUMAN,sp|O75593|FOXH1_HUMAN,sp|Q9H2X6|HIPK2_HUMAN
GO:0000989	transcription factor binding transcription factor activity	5 of 206 in the list	5 of 386 in all the Protein	0.0423114	sp|Q14192|FHL2_HUMAN,sp|Q06546|GABPA_HUMAN,sp|Q15645|PCH2_HUMAN,sp|O75593|FOXH1_HUMAN,sp|Q9H2X6|HIPK2_HUMAN
GO:0003712	transcription cofactor activity	5 of 206 in the list	5 of 386 in all the Protein	0.0423114	sp|Q14192|FHL2_HUMAN,sp|Q06546|GABPA_HUMAN,sp|Q15645|PCH2_HUMAN,sp|O75593|FOXH1_HUMAN,sp|Q9H2X6|HIPK2_HUMAN
GO:0005044	scavenger receptor activity	5 of 206 in the list	5 of 386 in all the Protein	0.0423114	sp|P04004|VTNC_HUMAN,sp|A1L4H1|SRCRL_HUMAN,sp|Q08380|LG3BP_HUMAN,sp|O43866|CD5L_HUMAN,sp|P05156|CFAI_HUMAN
GO:0005125	cytokine activity	5 of 206 in the list	5 of 386 in all the Protein	0.0423114	sp|Q14116|IL18_HUMAN,sp|P02776|PLF4_HUMAN,sp|Q15848|ADIPO_HUMAN,sp|P02775|CXCL7_HUMAN,sp|P01031|CO5_HUMAN
GO:0019825	oxygen binding	5 of 206 in the list	5 of 386 in all the Protein	0.0423114	sp|P02768|ALBU_HUMAN,sp|P02042|HBD_HUMAN,sp|P68871|HBB_HUMAN,sp|P04179|SODM_HUMAN,sp|P69905|HBA_HUMAN
GO:0019904	protein domain specific binding	11 of 206 in the list	14 of 386 in all the Protein	0.046469	sp|P06213|INSR_HUMAN,sp|P05452|TETN_HUMAN,sp|O43424|GRID2_HUMAN,sp|O75593|FOXH1_HUMAN,sp|Q8TC29|ENKUR_HUMAN,sp|Q9Y490|TLN1_HUMAN,sp|Q01814|AT2B2_HUMAN,sp|Q9GZM3|RPB1B_HUMAN,sp|P11021|GRP78_HUMAN,sp|Q9P0K8|FOXJ2_HUMAN,sp|P00747|PLMN_HUMAN
GO:0003676	nucleic acid binding	28 of 206 in the list	42 of 386 in all the Protein	0.0468385	sp|P07910|HNRPC_HUMAN,sp|P62277|RS13_HUMAN,sp|P25786|PSA1_HUMAN,sp|Q6PK81|ZN773_HUMAN,sp|P55769|NH2L1_HUMAN,sp|Q86YE8|ZN573_HUMAN,sp|Q9GZM3|RPB1B_HUMAN,sp|Q7Z340|ZN551_HUMAN,sp|P28347|TEAD1_HUMAN,sp|P04179|SODM_HUMAN,sp|P0C0S5|H2AZ_HUMAN,sp|Q06546|GABPA_HUMAN,sp|Q86YC2|PALB2_HUMAN,sp|Q9QC07|POK18_HUMAN,sp|P46779|RL28_HUMAN,sp|P17480|UBF1_HUMAN,sp|P62701|RS4X_HUMAN,sp|O75593|FOXH1_HUMAN,sp|Q7L9B9|…
GO:0022892	substrate-specific transporter activity	23 of 206 in the list	34 of 386 in all the Protein	0.057336	sp|P04114|APOB_HUMAN,sp|P02647|APOA1_HUMAN,sp|P06727|APOA4_HUMAN,sp|Q02985|FHR3_HUMAN,sp|Q96JB2|COG3_HUMAN,sp|Q01814|AT2B2_HUMAN,sp|P04839|CY24B_HUMAN,sp|P05090|APOD_HUMAN,sp|Q07954|LRP1_HUMAN,sp|P16615|AT2A2_HUMAN,sp|P02652|APOA2_HUMAN,sp|O75964|ATP5L_HUMAN,sp|O43424|GRID2_HUMAN,sp|Q00325|MPCP_HUMAN,sp|P45880|VDAC2_HUMAN,sp|P06576|ATPB_HUMAN,sp|P02042|HBD_HUMAN,sp|P54709|AT1B3_HUMAN,sp|P68871|HB…
GO:0008134	transcription factor binding	8 of 206 in the list	10 of 386 in all the Protein	0.0798774	sp|P60709|ACTB_HUMAN,sp|Q14192|FHL2_HUMAN,sp|P13693|TCTP_HUMAN,sp|O75593|FOXH1_HUMAN,sp|P22352|GPX3_HUMAN,sp|P60900|PSA6_HUMAN,sp|Q9H2X6|HIPK2_HUMAN,sp|Q9P0K8|FOXJ2_HUMAN
GO:0016887	ATPase activity	8 of 206 in the list	10 of 386 in all the Protein	0.0798774	sp|O75964|ATP5L_HUMAN,sp|P06576|ATPB_HUMAN,sp|P11021|GRP78_HUMAN,sp|Q01814|AT2B2_HUMAN,sp|P54709|AT1B3_HUMAN,sp|P10909|CLUS_HUMAN,sp|P16615|AT2A2_HUMAN,sp|Q96T23|RSF1_HUMAN
GO:0050662	coenzyme binding	8 of 206 in the list	10 of 386 in all the Protein	0.0798774	sp|P50213|IDH3A_HUMAN,sp|P06213|INSR_HUMAN,sp|P55084|ECHB_HUMAN,sp|P04839|CY24B_HUMAN,sp|P29401|TKT_HUMAN,sp|P31040|SDHA_HUMAN,sp|O43837|IDH3B_HUMAN,sp|P00390|GSHR_HUMAN
GO:0005216	ion channel activity	4 of 206 in the list	4 of 386 in all the Protein	0.0800146	sp|P45880|VDAC2_HUMAN,sp|P04839|CY24B_HUMAN,sp|O43424|GRID2_HUMAN,sp|O14791|APOL1_HUMAN
GO:0015267	channel activity	4 of 206 in the list	4 of 386 in all the Protein	0.0800146	sp|P45880|VDAC2_HUMAN,sp|P04839|CY24B_HUMAN,sp|O43424|GRID2_HUMAN,sp|O14791|APOL1_HUMAN
GO:0022803	passive transmembrane transporter activity	4 of 206 in the list	4 of 386 in all the Protein	0.0800146	sp|P45880|VDAC2_HUMAN,sp|P04839|CY24B_HUMAN,sp|O43424|GRID2_HUMAN,sp|O14791|APOL1_HUMAN
GO:0022838	substrate-specific channel activity	4 of 206 in the list	4 of 386 in all the Protein	0.0800146	sp|P45880|VDAC2_HUMAN,sp|P04839|CY24B_HUMAN,sp|O43424|GRID2_HUMAN,sp|O14791|APOL1_HUMAN
GO:0072341	modified amino acid binding	4 of 206 in the list	4 of 386 in all the Protein	0.0800146	sp|P15169|CBPN_HUMAN,sp|P07996|TSP1_HUMAN,sp|P00390|GSHR_HUMAN,sp|P22352|GPX3_HUMAN
GO:0009055	electron carrier activity	6 of 206 in the list	7 of 386 in all the Protein	0.0857625	sp|O00391|QSOX1_HUMAN,sp|P04839|CY24B_HUMAN,sp|P03952|KLKB1_HUMAN,sp|P07237|PDIA1_HUMAN,sp|O43837|IDH3B_HUMAN,sp|P00390|GSHR_HUMAN
GO:0005509	calcium ion binding	27 of 206 in the list	42 of 386 in all the Protein	0.0897041	sp|Q9NQ79|CRAC1_HUMAN,sp|P07996|TSP1_HUMAN,sp|P05452|TETN_HUMAN,sp|P35555|FBN1_HUMAN,sp|Q13813|SPTN1_HUMAN,sp|P14543|NID1_HUMAN,sp|Q12841|FSTL1_HUMAN,sp|P19827|ITIH1_HUMAN,sp|P33151|CADH5_HUMAN,sp|P07225|PROS_HUMAN,sp|P49747|COMP_HUMAN,sp|Q01814|AT2B2_HUMAN,sp|Q07954|LRP1_HUMAN,sp|P09871|C1S_HUMAN,sp|Q8IV61|GRP3_HUMAN,sp|P19022|CADH2_HUMAN,sp|P16615|AT2A2_HUMAN,sp|P00736|C1R_HUMAN,sp|P00742|FA10_…
GO:0003677	DNA binding	18 of 206 in the list	27 of 386 in all the Protein	0.107477	sp|Q6PK81|ZN773_HUMAN,sp|Q86YE8|ZN573_HUMAN,sp|Q9GZM3|RPB1B_HUMAN,sp|Q7Z340|ZN551_HUMAN,sp|P28347|TEAD1_HUMAN,sp|P04179|SODM_HUMAN,sp|P0C0S5|H2AZ_HUMAN,sp|Q06546|GABPA_HUMAN,sp|Q86YC2|PALB2_HUMAN,sp|P17480|UBF1_HUMAN,sp|Q7L9B9|EEPD1_HUMAN,sp|O75593|FOXH1_HUMAN,sp|Q9H3D4|P63_HUMAN,sp|Q8TF76|HASP_HUMAN,sp|Q6NT04|TIGD7_HUMAN,sp|Q9P0K8|FOXJ2_HUMAN,sp|P02768|ALBU_HUMAN,sp|Q6P9A3|ZN549_HUMAN
GO:1901363	heterocyclic compound binding	59 of 206 in the list	100 of 386 in all the Protein	0.115861	sp|Q15645|PCH2_HUMAN,sp|P07910|HNRPC_HUMAN,sp|P62277|RS13_HUMAN,sp|P25786|PSA1_HUMAN,sp|O43837|IDH3B_HUMAN,sp|P53778|MK12_HUMAN,sp|Q9H2X6|HIPK2_HUMAN,sp|Q6PK81|ZN773_HUMAN,sp|Q96S38|KS6C1_HUMAN,sp|P55084|ECHB_HUMAN,sp|P04839|CY24B_HUMAN,sp|P29401|TKT_HUMAN,sp|Q9GZM3|RPB1B_HUMAN,sp|Q7Z340|ZN551_HUMAN,sp|P03952|KLKB1_HUMAN,sp|Q12931|TRAP1_HUMAN,sp|Q02750|MP2K1_HUMAN,sp|Q86YC2|PALB2_HUMAN,sp|P17480|…
GO:0097159	organic cyclic compound binding	65 of 206 in the list	111 of 386 in all the Protein	0.117676	sp|P07910|HNRPC_HUMAN,sp|O43837|IDH3B_HUMAN,sp|P53778|MK12_HUMAN,sp|Q9H2X6|HIPK2_HUMAN,sp|Q96S38|KS6C1_HUMAN,sp|P55084|ECHB_HUMAN,sp|P29401|TKT_HUMAN,sp|Q9GZM3|RPB1B_HUMAN,sp|P03952|KLKB1_HUMAN,sp|Q12931|TRAP1_HUMAN,sp|Q86YC2|PALB2_HUMAN,sp|Q7L9B9|EEPD1_HUMAN,sp|P45880|VDAC2_HUMAN,sp|Q9H3D4|P63_HUMAN,sp|P06213|INSR_HUMAN,sp|P02647|APOA1_HUMAN,sp|P55769|NH2L1_HUMAN,sp|P08185|CBG_HUMAN,sp|P41240|CS…
GO:0015075	ion transmembrane transporter activity	10 of 206 in the list	14 of 386 in all the Protein	0.133694	sp|O75964|ATP5L_HUMAN,sp|O43424|GRID2_HUMAN,sp|Q00325|MPCP_HUMAN,sp|P45880|VDAC2_HUMAN,sp|P06576|ATPB_HUMAN,sp|Q01814|AT2B2_HUMAN,sp|P04839|CY24B_HUMAN,sp|P54709|AT1B3_HUMAN,sp|P16615|AT2A2_HUMAN,sp|O14791|APOL1_HUMAN
GO:0000981	sequence-specific DNA binding RNA polymerase II transcription factor activity	3 of 206 in the list	3 of 386 in all the Protein	0.150964	sp|Q9H3D4|P63_HUMAN,sp|Q9P0K8|FOXJ2_HUMAN,sp|O75593|FOXH1_HUMAN
GO:0003690	double-stranded DNA binding	3 of 206 in the list	3 of 386 in all the Protein	0.150964	sp|Q9H3D4|P63_HUMAN,sp|Q9P0K8|FOXJ2_HUMAN,sp|O75593|FOXH1_HUMAN
GO:0003713	transcription coactivator activity	3 of 206 in the list	3 of 386 in all the Protein	0.150964	sp|Q14192|FHL2_HUMAN,sp|Q06546|GABPA_HUMAN,sp|Q9H2X6|HIPK2_HUMAN
GO:0004180	carboxypeptidase activity	3 of 206 in the list	3 of 386 in all the Protein	0.150964	sp|P15169|CBPN_HUMAN,sp|Q13867|BLMH_HUMAN,sp|Q96IY4|CBPB2_HUMAN
GO:0005179	hormone activity	3 of 206 in the list	3 of 386 in all the Protein	0.150964	sp|Q15848|ADIPO_HUMAN,sp|P01019|ANGT_HUMAN,sp|P02766|TTHY_HUMAN
GO:0005344	oxygen transporter activity	3 of 206 in the list	3 of 386 in all the Protein	0.150964	sp|P02042|HBD_HUMAN,sp|P68871|HBB_HUMAN,sp|P69905|HBA_HUMAN
GO:0008009	chemokine activity	3 of 206 in the list	3 of 386 in all the Protein	0.150964	sp|P02776|PLF4_HUMAN,sp|P02775|CXCL7_HUMAN,sp|P01031|CO5_HUMAN
GO:0015036	disulfide oxidoreductase activity	3 of 206 in the list	3 of 386 in all the Protein	0.150964	sp|O00391|QSOX1_HUMAN,sp|P07237|PDIA1_HUMAN,sp|P00390|GSHR_HUMAN
GO:0016705	oxidoreductase activity, acting on paired donors, with incorporation or reduction of molecular oxygen	3 of 206 in the list	3 of 386 in all the Protein	0.150964	sp|P09172|DOPO_HUMAN,sp|P03952|KLKB1_HUMAN,sp|P07237|PDIA1_HUMAN
GO:0022836	gated channel activity	3 of 206 in the list	3 of 386 in all the Protein	0.150964	sp|P45880|VDAC2_HUMAN,sp|P04839|CY24B_HUMAN,sp|O43424|GRID2_HUMAN
GO:0022839	ion gated channel activity	3 of 206 in the list	3 of 386 in all the Protein	0.150964	sp|P45880|VDAC2_HUMAN,sp|P04839|CY24B_HUMAN,sp|O43424|GRID2_HUMAN
GO:0031994	insulin-like growth factor I binding	3 of 206 in the list	3 of 386 in all the Protein	0.150964	sp|P17936|IBP3_HUMAN,sp|P06213|INSR_HUMAN,sp|P18065|IBP2_HUMAN
GO:0031995	insulin-like growth factor II binding	3 of 206 in the list	3 of 386 in all the Protein	0.150964	sp|P17936|IBP3_HUMAN,sp|P06213|INSR_HUMAN,sp|P18065|IBP2_HUMAN
GO:0042379	chemokine receptor binding	3 of 206 in the list	3 of 386 in all the Protein	0.150964	sp|P02776|PLF4_HUMAN,sp|P02775|CXCL7_HUMAN,sp|P01031|CO5_HUMAN
GO:0043566	structure-specific DNA binding	3 of 206 in the list	3 of 386 in all the Protein	0.150964	sp|Q9H3D4|P63_HUMAN,sp|Q9P0K8|FOXJ2_HUMAN,sp|O75593|FOXH1_HUMAN
GO:0048037	cofactor binding	12 of 206 in the list	18 of 386 in all the Protein	0.180208	sp|P17174|AATC_HUMAN,sp|P06213|INSR_HUMAN,sp|P01024|CO3_HUMAN,sp|O43837|IDH3B_HUMAN,sp|P50213|IDH3A_HUMAN,sp|P55084|ECHB_HUMAN,sp|P04839|CY24B_HUMAN,sp|P29401|TKT_HUMAN,sp|P00505|AATM_HUMAN,sp|P31040|SDHA_HUMAN,sp|P02768|ALBU_HUMAN,sp|P00390|GSHR_HUMAN
GO:0005215	transporter activity	24 of 206 in the list	39 of 386 in all the Protein	0.181776	sp|P15169|CBPN_HUMAN,sp|P04114|APOB_HUMAN,sp|P02647|APOA1_HUMAN,sp|P06727|APOA4_HUMAN,sp|Q02985|FHR3_HUMAN,sp|Q96JB2|COG3_HUMAN,sp|Q01814|AT2B2_HUMAN,sp|P04839|CY24B_HUMAN,sp|P05090|APOD_HUMAN,sp|Q07954|LRP1_HUMAN,sp|P16615|AT2A2_HUMAN,sp|P02652|APOA2_HUMAN,sp|O75964|ATP5L_HUMAN,sp|O43424|GRID2_HUMAN,sp|Q00325|MPCP_HUMAN,sp|P45880|VDAC2_HUMAN,sp|P06576|ATPB_HUMAN,sp|P02042|HBD_HUMAN,sp|P54709|AT1…
GO:0003723	RNA binding	9 of 206 in the list	13 of 386 in all the Protein	0.189356	sp|P62263|RS14_HUMAN,sp|P55769|NH2L1_HUMAN,sp|Q9QC07|POK18_HUMAN,sp|P62277|RS13_HUMAN,sp|P25786|PSA1_HUMAN,sp|P46779|RL28_HUMAN,sp|P62701|RS4X_HUMAN,sp|P32969|RL9_HUMAN,sp|P60900|PSA6_HUMAN
GO:0019900	kinase binding	6 of 206 in the list	8 of 386 in all the Protein	0.190632	sp|P60709|ACTB_HUMAN,sp|P06213|INSR_HUMAN,sp|P08670|VIME_HUMAN,sp|Q8IV61|GRP3_HUMAN,sp|P19022|CADH2_HUMAN,sp|Q02750|MP2K1_HUMAN
GO:0008289	lipid binding	25 of 206 in the list	41 of 386 in all the Protein	0.193204	sp|P15169|CBPN_HUMAN,sp|P07996|TSP1_HUMAN,sp|P06213|INSR_HUMAN,sp|P25786|PSA1_HUMAN,sp|P28070|PSB4_HUMAN,sp|P04114|APOB_HUMAN,sp|P02647|APOA1_HUMAN,sp|P06727|APOA4_HUMAN,sp|Q96S38|KS6C1_HUMAN,sp|P00352|AL1A1_HUMAN,sp|P08185|CBG_HUMAN,sp|P07360|CO8G_HUMAN,sp|P55058|PLTP_HUMAN,sp|P05090|APOD_HUMAN,sp|Q8IV61|GRP3_HUMAN,sp|P19022|CADH2_HUMAN,sp|P02652|APOA2_HUMAN,sp|P00742|FA10_HUMAN,sp|P01024|CO3_HU…
GO:0046982	protein heterodimerization activity	7 of 206 in the list	10 of 386 in all the Protein	0.22958	sp|Q06546|GABPA_HUMAN,sp|P0C0S5|H2AZ_HUMAN,sp|P02652|APOA2_HUMAN,sp|P04839|CY24B_HUMAN,sp|Q13813|SPTN1_HUMAN,sp|P04114|APOB_HUMAN,sp|P07237|PDIA1_HUMAN
GO:0000287	magnesium ion binding	4 of 206 in the list	5 of 386 in all the Protein	0.230827	sp|P50213|IDH3A_HUMAN,sp|P29401|TKT_HUMAN,sp|O43837|IDH3B_HUMAN,sp|P53778|MK12_HUMAN
GO:0005126	cytokine receptor binding	4 of 206 in the list	5 of 386 in all the Protein	0.230827	sp|P02776|PLF4_HUMAN,sp|Q12931|TRAP1_HUMAN,sp|P02775|CXCL7_HUMAN,sp|P01031|CO5_HUMAN
GO:0019829	cation-transporting ATPase activity	4 of 206 in the list	5 of 386 in all the Protein	0.230827	sp|P06576|ATPB_HUMAN,sp|Q01814|AT2B2_HUMAN,sp|P54709|AT1B3_HUMAN,sp|P16615|AT2A2_HUMAN
GO:0019902	phosphatase binding	4 of 206 in the list	5 of 386 in all the Protein	0.230827	sp|P33151|CADH5_HUMAN,sp|P06213|INSR_HUMAN,sp|P41240|CSK_HUMAN,sp|P19022|CADH2_HUMAN
GO:0019903	protein phosphatase binding	4 of 206 in the list	5 of 386 in all the Protein	0.230827	sp|P33151|CADH5_HUMAN,sp|P06213|INSR_HUMAN,sp|P41240|CSK_HUMAN,sp|P19022|CADH2_HUMAN
GO:0042562	hormone binding	4 of 206 in the list	5 of 386 in all the Protein	0.230827	sp|P00352|AL1A1_HUMAN,sp|P06213|INSR_HUMAN,sp|P05543|THBG_HUMAN,sp|P02766|TTHY_HUMAN
GO:0004872	receptor activity	15 of 206 in the list	24 of 386 in all the Protein	0.238401	sp|P06213|INSR_HUMAN,sp|Q8NFY4|SEM6D_HUMAN,sp|O75882|ATRN_HUMAN,sp|O43424|GRID2_HUMAN,sp|Q04721|NOTC2_HUMAN,sp|P04004|VTNC_HUMAN,sp|A1L4H1|SRCRL_HUMAN,sp|Q9NZN1|IRPL1_HUMAN,sp|Q08380|LG3BP_HUMAN,sp|Q07954|LRP1_HUMAN,sp|P29401|TKT_HUMAN,sp|O43866|CD5L_HUMAN,sp|P05156|CFAI_HUMAN,sp|Q9NYQ6|CELR1_HUMAN,sp|Q8WZ75|ROBO4_HUMAN
GO:0022857	transmembrane transporter activity	11 of 206 in the list	17 of 386 in all the Protein	0.240325	sp|O75964|ATP5L_HUMAN,sp|O43424|GRID2_HUMAN,sp|Q00325|MPCP_HUMAN,sp|P45880|VDAC2_HUMAN,sp|P06576|ATPB_HUMAN,sp|Q01814|AT2B2_HUMAN,sp|P04839|CY24B_HUMAN,sp|P54709|AT1B3_HUMAN,sp|P02775|CXCL7_HUMAN,sp|P16615|AT2A2_HUMAN,sp|O14791|APOL1_HUMAN
GO:0022891	substrate-specific transmembrane transporter activity	11 of 206 in the list	17 of 386 in all the Protein	0.240325	sp|O75964|ATP5L_HUMAN,sp|O43424|GRID2_HUMAN,sp|Q00325|MPCP_HUMAN,sp|P45880|VDAC2_HUMAN,sp|P06576|ATPB_HUMAN,sp|Q01814|AT2B2_HUMAN,sp|P04839|CY24B_HUMAN,sp|P54709|AT1B3_HUMAN,sp|P02775|CXCL7_HUMAN,sp|P16615|AT2A2_HUMAN,sp|O14791|APOL1_HUMAN
GO:0003735	structural constituent of ribosome	5 of 206 in the list	7 of 386 in all the Protein	0.283502	sp|P62263|RS14_HUMAN,sp|P62277|RS13_HUMAN,sp|P46779|RL28_HUMAN,sp|P62701|RS4X_HUMAN,sp|P32969|RL9_HUMAN
GO:0005518	collagen binding	5 of 206 in the list	7 of 386 in all the Protein	0.283502	sp|P07996|TSP1_HUMAN,sp|P49747|COMP_HUMAN,sp|P29401|TKT_HUMAN,sp|P10124|SRGN_HUMAN,sp|P14543|NID1_HUMAN
GO:0016853	isomerase activity	5 of 206 in the list	7 of 386 in all the Protein	0.283502	sp|P42126|ECI1_HUMAN,sp|Q14318|FKBP8_HUMAN,sp|P07237|PDIA1_HUMAN,sp|Q96PE7|MCEE_HUMAN,sp|A2VDF0|FUCM_HUMAN
GO:0019901	protein kinase binding	5 of 206 in the list	7 of 386 in all the Protein	0.283502	sp|P60709|ACTB_HUMAN,sp|P06213|INSR_HUMAN,sp|P08670|VIME_HUMAN,sp|P19022|CADH2_HUMAN,sp|Q02750|MP2K1_HUMAN
GO:0022890	inorganic cation transmembrane transporter activity	5 of 206 in the list	7 of 386 in all the Protein	0.283502	sp|P06576|ATPB_HUMAN,sp|Q01814|AT2B2_HUMAN,sp|O75964|ATP5L_HUMAN,sp|P54709|AT1B3_HUMAN,sp|P16615|AT2A2_HUMAN
GO:0001076	RNA polymerase II transcription factor binding transcription factor activity	2 of 206 in the list	2 of 386 in all the Protein	0.284167	sp|O75593|FOXH1_HUMAN,sp|Q9H2X6|HIPK2_HUMAN
GO:0001104	RNA polymerase II transcription cofactor activity	2 of 206 in the list	2 of 386 in all the Protein	0.284167	sp|O75593|FOXH1_HUMAN,sp|Q9H2X6|HIPK2_HUMAN
GO:0001190	RNA polymerase II transcription factor binding transcription factor activity involved in positive regulation of transcription	2 of 206 in the list	2 of 386 in all the Protein	0.284167	sp|O75593|FOXH1_HUMAN,sp|Q9H2X6|HIPK2_HUMAN
GO:0001786	phosphatidylserine binding	2 of 206 in the list	2 of 386 in all the Protein	0.284167	sp|P15169|CBPN_HUMAN,sp|P07996|TSP1_HUMAN
GO:0001968	fibronectin binding	2 of 206 in the list	2 of 386 in all the Protein	0.284167	sp|P17936|IBP3_HUMAN,sp|P07996|TSP1_HUMAN
GO:0003705	RNA polymerase II distal enhancer sequence-specific DNA binding transcription factor activity	2 of 206 in the list	2 of 386 in all the Protein	0.284167	sp|Q9P0K8|FOXJ2_HUMAN,sp|O75593|FOXH1_HUMAN
GO:0004069	L-aspartate:2-oxoglutarate aminotransferase activity	2 of 206 in the list	2 of 386 in all the Protein	0.284167	sp|P17174|AATC_HUMAN,sp|P00505|AATM_HUMAN
GO:0004181	metallocarboxypeptidase activity	2 of 206 in the list	2 of 386 in all the Protein	0.284167	sp|P15169|CBPN_HUMAN,sp|Q96IY4|CBPB2_HUMAN
GO:0004448	isocitrate dehydrogenase activity	2 of 206 in the list	2 of 386 in all the Protein	0.284167	sp|P50213|IDH3A_HUMAN,sp|O43837|IDH3B_HUMAN
GO:0004449	isocitrate dehydrogenase (NAD+) activity	2 of 206 in the list	2 of 386 in all the Protein	0.284167	sp|P50213|IDH3A_HUMAN,sp|O43837|IDH3B_HUMAN
GO:0004497	monooxygenase activity	2 of 206 in the list	2 of 386 in all the Protein	0.284167	sp|P09172|DOPO_HUMAN,sp|P03952|KLKB1_HUMAN
GO:0005099	Ras GTPase activator activity	2 of 206 in the list	2 of 386 in all the Protein	0.284167	sp|P00352|AL1A1_HUMAN,sp|Q8IV61|GRP3_HUMAN
GO:0005244	voltage-gated ion channel activity	2 of 206 in the list	2 of 386 in all the Protein	0.284167	sp|P45880|VDAC2_HUMAN,sp|P04839|CY24B_HUMAN
GO:0005253	anion channel activity	2 of 206 in the list	2 of 386 in all the Protein	0.284167	sp|P45880|VDAC2_HUMAN,sp|O14791|APOL1_HUMAN
GO:0008035	high-density lipoprotein particle binding	2 of 206 in the list	2 of 386 in all the Protein	0.284167	sp|P02652|APOA2_HUMAN,sp|P02647|APOA1_HUMAN
GO:0008144	drug binding	2 of 206 in the list	2 of 386 in all the Protein	0.284167	sp|P02768|ALBU_HUMAN,sp|Q14318|FKBP8_HUMAN
GO:0008234	cysteine-type peptidase activity	2 of 206 in the list	2 of 386 in all the Protein	0.284167	sp|Q96FW1|OTUB1_HUMAN,sp|Q13867|BLMH_HUMAN
GO:0008235	metalloexopeptidase activity	2 of 206 in the list	2 of 386 in all the Protein	0.284167	sp|P15169|CBPN_HUMAN,sp|Q96IY4|CBPB2_HUMAN
GO:0008301	DNA binding, bending	2 of 206 in the list	2 of 386 in all the Protein	0.284167	sp|Q9P0K8|FOXJ2_HUMAN,sp|O75593|FOXH1_HUMAN
GO:0015035	protein disulfide oxidoreductase activity	2 of 206 in the list	2 of 386 in all the Protein	0.284167	sp|O00391|QSOX1_HUMAN,sp|P07237|PDIA1_HUMAN
GO:0015078	hydrogen ion transmembrane transporter activity	2 of 206 in the list	2 of 386 in all the Protein	0.284167	sp|P06576|ATPB_HUMAN,sp|O75964|ATP5L_HUMAN
GO:0016854	racemase and epimerase activity	2 of 206 in the list	2 of 386 in all the Protein	0.284167	sp|Q96PE7|MCEE_HUMAN,sp|A2VDF0|FUCM_HUMAN
GO:0019213	deacetylase activity	2 of 206 in the list	2 of 386 in all the Protein	0.284167	sp|P10768|ESTD_HUMAN,sp|Q9H3R1|NDST4_HUMAN
GO:0019966	interleukin-1 binding	2 of 206 in the list	2 of 386 in all the Protein	0.284167	sp|Q9NZN1|IRPL1_HUMAN,sp|P01023|A2MG_HUMAN
GO:0022832	voltage-gated channel activity	2 of 206 in the list	2 of 386 in all the Protein	0.284167	sp|P45880|VDAC2_HUMAN,sp|P04839|CY24B_HUMAN
GO:0031714	C5a anaphylatoxin chemotactic receptor binding	2 of 206 in the list	2 of 386 in all the Protein	0.284167	sp|P01024|CO3_HUMAN,sp|P01031|CO5_HUMAN
GO:0031720	haptoglobin binding	2 of 206 in the list	2 of 386 in all the Protein	0.284167	sp|P68871|HBB_HUMAN,sp|P69905|HBA_HUMAN
GO:0035257	nuclear hormone receptor binding	2 of 206 in the list	2 of 386 in all the Protein	0.284167	sp|Q14192|FHL2_HUMAN,sp|O75593|FOXH1_HUMAN
GO:0035258	steroid hormone receptor binding	2 of 206 in the list	2 of 386 in all the Protein	0.284167	sp|Q14192|FHL2_HUMAN,sp|O75593|FOXH1_HUMAN
GO:0043295	glutathione binding	2 of 206 in the list	2 of 386 in all the Protein	0.284167	sp|P00390|GSHR_HUMAN,sp|P22352|GPX3_HUMAN
GO:0043548	phosphatidylinositol 3-kinase binding	2 of 206 in the list	2 of 386 in all the Protein	0.284167	sp|P31146|COR1A_HUMAN,sp|P06213|INSR_HUMAN
GO:0046332	SMAD binding	2 of 206 in the list	2 of 386 in all the Protein	0.284167	sp|O75593|FOXH1_HUMAN,sp|Q9H2X6|HIPK2_HUMAN
GO:0050681	androgen receptor binding	2 of 206 in the list	2 of 386 in all the Protein	0.284167	sp|Q14192|FHL2_HUMAN,sp|O75593|FOXH1_HUMAN
GO:0051427	hormone receptor binding	2 of 206 in the list	2 of 386 in all the Protein	0.284167	sp|Q14192|FHL2_HUMAN,sp|O75593|FOXH1_HUMAN
GO:0051787	misfolded protein binding	2 of 206 in the list	2 of 386 in all the Protein	0.284167	sp|P11021|GRP78_HUMAN,sp|P10909|CLUS_HUMAN
GO:0070546	L-phenylalanine aminotransferase activity	2 of 206 in the list	2 of 386 in all the Protein	0.284167	sp|P17174|AATC_HUMAN,sp|P00505|AATM_HUMAN
GO:0080130	L-phenylalanine:2-oxoglutarate aminotransferase activity	2 of 206 in the list	2 of 386 in all the Protein	0.284167	sp|P17174|AATC_HUMAN,sp|P00505|AATM_HUMAN
GO:1900750	oligopeptide binding	2 of 206 in the list	2 of 386 in all the Protein	0.284167	sp|P00390|GSHR_HUMAN,sp|P22352|GPX3_HUMAN
GO:0031406	carboxylic acid binding	10 of 206 in the list	16 of 386 in all the Protein	0.313559	sp|P17174|AATC_HUMAN,sp|P15169|CBPN_HUMAN,sp|P07996|TSP1_HUMAN,sp|P06213|INSR_HUMAN,sp|Q15848|ADIPO_HUMAN,sp|P09172|DOPO_HUMAN,sp|P22352|GPX3_HUMAN,sp|P05154|IPSP_HUMAN,sp|P02768|ALBU_HUMAN,sp|P00390|GSHR_HUMAN
GO:0001664	G-protein coupled receptor binding	6 of 206 in the list	9 of 386 in all the Protein	0.322321	sp|P02776|PLF4_HUMAN,sp|P01024|CO3_HUMAN,sp|P01019|ANGT_HUMAN,sp|P02775|CXCL7_HUMAN,sp|P01031|CO5_HUMAN,sp|P16615|AT2A2_HUMAN
GO:0008022	protein C-terminus binding	6 of 206 in the list	9 of 386 in all the Protein	0.322321	sp|P31146|COR1A_HUMAN,sp|Q01814|AT2B2_HUMAN,sp|P08670|VIME_HUMAN,sp|P41240|CSK_HUMAN,sp|P98160|PGBM_HUMAN,sp|P16615|AT2A2_HUMAN
GO:0004175	endopeptidase activity	21 of 206 in the list	36 of 386 in all the Protein	0.326925	sp|P49720|PSB3_HUMAN,sp|O14818|PSA7_HUMAN,sp|P20618|PSB1_HUMAN,sp|P25786|PSA1_HUMAN,sp|P28070|PSB4_HUMAN,sp|P25789|PSA4_HUMAN,sp|P28066|PSA5_HUMAN,sp|P25787|PSA2_HUMAN,sp|P49721|PSB2_HUMAN,sp|P05156|CFAI_HUMAN,sp|P09871|C1S_HUMAN,sp|P00747|PLMN_HUMAN,sp|P03952|KLKB1_HUMAN,sp|P00746|CFAD_HUMAN,sp|P00736|C1R_HUMAN,sp|P00742|FA10_HUMAN,sp|P00739|HPTR_HUMAN,sp|Q13867|BLMH_HUMAN,sp|P28065|PSB9_HUMAN,s…
GO:0016462	pyrophosphatase activity	11 of 206 in the list	18 of 386 in all the Protein	0.334794	sp|Q15645|PCH2_HUMAN,sp|O75964|ATP5L_HUMAN,sp|A6NNZ2|TBB8L_HUMAN,sp|Q9UI46|DNAI1_HUMAN,sp|P06576|ATPB_HUMAN,sp|Q01814|AT2B2_HUMAN,sp|P11021|GRP78_HUMAN,sp|P54709|AT1B3_HUMAN,sp|Q96T23|RSF1_HUMAN,sp|P10909|CLUS_HUMAN,sp|P16615|AT2A2_HUMAN
GO:0016817	hydrolase activity, acting on acid anhydrides	11 of 206 in the list	18 of 386 in all the Protein	0.334794	sp|Q15645|PCH2_HUMAN,sp|O75964|ATP5L_HUMAN,sp|A6NNZ2|TBB8L_HUMAN,sp|Q9UI46|DNAI1_HUMAN,sp|P06576|ATPB_HUMAN,sp|Q01814|AT2B2_HUMAN,sp|P11021|GRP78_HUMAN,sp|P54709|AT1B3_HUMAN,sp|Q96T23|RSF1_HUMAN,sp|P10909|CLUS_HUMAN,sp|P16615|AT2A2_HUMAN
GO:0016818	hydrolase activity, acting on acid anhydrides, in phosphorus-containing anhydrides	11 of 206 in the list	18 of 386 in all the Protein	0.334794	sp|Q15645|PCH2_HUMAN,sp|O75964|ATP5L_HUMAN,sp|A6NNZ2|TBB8L_HUMAN,sp|Q9UI46|DNAI1_HUMAN,sp|P06576|ATPB_HUMAN,sp|Q01814|AT2B2_HUMAN,sp|P11021|GRP78_HUMAN,sp|P54709|AT1B3_HUMAN,sp|Q96T23|RSF1_HUMAN,sp|P10909|CLUS_HUMAN,sp|P16615|AT2A2_HUMAN
GO:0017111	nucleoside-triphosphatase activity	11 of 206 in the list	18 of 386 in all the Protein	0.334794	sp|Q15645|PCH2_HUMAN,sp|O75964|ATP5L_HUMAN,sp|A6NNZ2|TBB8L_HUMAN,sp|Q9UI46|DNAI1_HUMAN,sp|P06576|ATPB_HUMAN,sp|Q01814|AT2B2_HUMAN,sp|P11021|GRP78_HUMAN,sp|P54709|AT1B3_HUMAN,sp|Q96T23|RSF1_HUMAN,sp|P10909|CLUS_HUMAN,sp|P16615|AT2A2_HUMAN
GO:0005543	phospholipid binding	12 of 206 in the list	20 of 386 in all the Protein	0.353829	sp|P15169|CBPN_HUMAN,sp|P07996|TSP1_HUMAN,sp|P02652|APOA2_HUMAN,sp|P00742|FA10_HUMAN,sp|P04114|APOB_HUMAN,sp|P02647|APOA1_HUMAN,sp|P06727|APOA4_HUMAN,sp|Q96S38|KS6C1_HUMAN,sp|O75038|PLCH2_HUMAN,sp|P05154|IPSP_HUMAN,sp|O95445|APOM_HUMAN,sp|P19022|CADH2_HUMAN
GO:0070011	peptidase activity, acting on L-amino acid peptides	24 of 206 in the list	42 of 386 in all the Protein	0.362197	sp|P15169|CBPN_HUMAN,sp|P49720|PSB3_HUMAN,sp|O14818|PSA7_HUMAN,sp|P20618|PSB1_HUMAN,sp|P25786|PSA1_HUMAN,sp|P28070|PSB4_HUMAN,sp|P25789|PSA4_HUMAN,sp|P28066|PSA5_HUMAN,sp|P25787|PSA2_HUMAN,sp|P49721|PSB2_HUMAN,sp|P05156|CFAI_HUMAN,sp|P09871|C1S_HUMAN,sp|P00747|PLMN_HUMAN,sp|P03952|KLKB1_HUMAN,sp|Q96FW1|OTUB1_HUMAN,sp|P00746|CFAD_HUMAN,sp|P00736|C1R_HUMAN,sp|P00742|FA10_HUMAN,sp|P00739|HPTR_HUMAN,…
GO:0008483	transaminase activity	3 of 206 in the list	4 of 386 in all the Protein	0.36381	sp|P17174|AATC_HUMAN,sp|P00505|AATM_HUMAN,sp|P01019|ANGT_HUMAN
GO:0008509	anion transmembrane transporter activity	3 of 206 in the list	4 of 386 in all the Protein	0.36381	sp|P45880|VDAC2_HUMAN,sp|O14791|APOL1_HUMAN,sp|Q00325|MPCP_HUMAN
GO:0015077	monovalent inorganic cation transmembrane transporter activity	3 of 206 in the list	4 of 386 in all the Protein	0.36381	sp|P06576|ATPB_HUMAN,sp|O75964|ATP5L_HUMAN,sp|P54709|AT1B3_HUMAN
GO:0016614	oxidoreductase activity, acting on CH-OH group of donors	3 of 206 in the list	4 of 386 in all the Protein	0.36381	sp|P50213|IDH3A_HUMAN,sp|P55084|ECHB_HUMAN,sp|O43837|IDH3B_HUMAN
GO:0016616	oxidoreductase activity, acting on the CH-OH group of donors, NAD or NADP as acceptor	3 of 206 in the list	4 of 386 in all the Protein	0.36381	sp|P50213|IDH3A_HUMAN,sp|P55084|ECHB_HUMAN,sp|O43837|IDH3B_HUMAN
GO:0016769	transferase activity, transferring nitrogenous groups	3 of 206 in the list	4 of 386 in all the Protein	0.36381	sp|P17174|AATC_HUMAN,sp|P00505|AATM_HUMAN,sp|P01019|ANGT_HUMAN
GO:0017016	Ras GTPase binding	3 of 206 in the list	4 of 386 in all the Protein	0.36381	sp|Q8TD16|BICD2_HUMAN,sp|Q8IV61|GRP3_HUMAN,sp|Q02750|MP2K1_HUMAN
GO:0031267	small GTPase binding	3 of 206 in the list	4 of 386 in all the Protein	0.36381	sp|Q8TD16|BICD2_HUMAN,sp|Q8IV61|GRP3_HUMAN,sp|Q02750|MP2K1_HUMAN
GO:0050660	flavin adenine dinucleotide binding	3 of 206 in the list	4 of 386 in all the Protein	0.36381	sp|P04839|CY24B_HUMAN,sp|P31040|SDHA_HUMAN,sp|P00390|GSHR_HUMAN
GO:0051020	GTPase binding	3 of 206 in the list	4 of 386 in all the Protein	0.36381	sp|Q8TD16|BICD2_HUMAN,sp|Q8IV61|GRP3_HUMAN,sp|Q02750|MP2K1_HUMAN
GO:0051082	unfolded protein binding	3 of 206 in the list	4 of 386 in all the Protein	0.36381	sp|P11021|GRP78_HUMAN,sp|Q12931|TRAP1_HUMAN,sp|P02743|SAMP_HUMAN
GO:0051287	NAD binding	3 of 206 in the list	4 of 386 in all the Protein	0.36381	sp|P50213|IDH3A_HUMAN,sp|P55084|ECHB_HUMAN,sp|O43837|IDH3B_HUMAN
GO:0008233	peptidase activity	25 of 206 in the list	44 of 386 in all the Protein	0.373008	sp|P15169|CBPN_HUMAN,sp|P49720|PSB3_HUMAN,sp|O14818|PSA7_HUMAN,sp|P20618|PSB1_HUMAN,sp|P25786|PSA1_HUMAN,sp|P28070|PSB4_HUMAN,sp|P25789|PSA4_HUMAN,sp|P28066|PSA5_HUMAN,sp|P25787|PSA2_HUMAN,sp|P49721|PSB2_HUMAN,sp|P05156|CFAI_HUMAN,sp|P09871|C1S_HUMAN,sp|P00747|PLMN_HUMAN,sp|P03952|KLKB1_HUMAN,sp|Q96FW1|OTUB1_HUMAN,sp|P00746|CFAD_HUMAN,sp|P00736|C1R_HUMAN,sp|P00742|FA10_HUMAN,sp|P00739|HPTR_HUMAN,…
GO:0005524	ATP binding	19 of 206 in the list	33 of 386 in all the Protein	0.374293	sp|P60709|ACTB_HUMAN,sp|Q15645|PCH2_HUMAN,sp|P06213|INSR_HUMAN,sp|P53778|MK12_HUMAN,sp|Q9H2X6|HIPK2_HUMAN,sp|Q96S38|KS6C1_HUMAN,sp|Q01814|AT2B2_HUMAN,sp|P41240|CSK_HUMAN,sp|P29401|TKT_HUMAN,sp|Q12931|TRAP1_HUMAN,sp|Q02750|MP2K1_HUMAN,sp|P16615|AT2A2_HUMAN,sp|Q4L235|ACSF4_HUMAN,sp|Q15772|SPEG_HUMAN,sp|A6NHR9|SMHD1_HUMAN,sp|P19367|HXK1_HUMAN,sp|P06576|ATPB_HUMAN,sp|Q8TF76|HASP_HUMAN,sp|P11021|GRP78…
GO:0016209	antioxidant activity	8 of 206 in the list	13 of 386 in all the Protein	0.378101	sp|P22352|GPX3_HUMAN,sp|P06727|APOA4_HUMAN,sp|P02768|ALBU_HUMAN,sp|P68871|HBB_HUMAN,sp|P69905|HBA_HUMAN,sp|P04179|SODM_HUMAN,sp|O95445|APOM_HUMAN,sp|P00390|GSHR_HUMAN
GO:0019838	growth factor binding	8 of 206 in the list	13 of 386 in all the Protein	0.378101	sp|P17936|IBP3_HUMAN,sp|P07996|TSP1_HUMAN,sp|Q9NZN1|IRPL1_HUMAN,sp|P06213|INSR_HUMAN,sp|P18065|IBP2_HUMAN,sp|P01023|A2MG_HUMAN,sp|P24592|IBP6_HUMAN,sp|P02458|CO2A1_HUMAN
GO:0046872	metal ion binding	55 of 206 in the list	100 of 386 in all the Protein	0.396527	sp|P17936|IBP3_HUMAN,sp|Q9NQ79|CRAC1_HUMAN,sp|P15169|CBPN_HUMAN,sp|P05452|TETN_HUMAN,sp|P35555|FBN1_HUMAN,sp|Q13813|SPTN1_HUMAN,sp|O43837|IDH3B_HUMAN,sp|P53778|MK12_HUMAN,sp|P06727|APOA4_HUMAN,sp|Q12841|FSTL1_HUMAN,sp|Q6PK81|ZN773_HUMAN,sp|P33151|CADH5_HUMAN,sp|P04839|CY24B_HUMAN,sp|Q07954|LRP1_HUMAN,sp|P29401|TKT_HUMAN,sp|Q7Z340|ZN551_HUMAN,sp|P03952|KLKB1_HUMAN,sp|P19022|CADH2_HUMAN,sp|Q14192|F…
GO:1901265	nucleoside phosphate binding	28 of 206 in the list	50 of 386 in all the Protein	0.40313	sp|P60709|ACTB_HUMAN,sp|Q15645|PCH2_HUMAN,sp|P06213|INSR_HUMAN,sp|O43837|IDH3B_HUMAN,sp|P53778|MK12_HUMAN,sp|Q9H2X6|HIPK2_HUMAN,sp|P50213|IDH3A_HUMAN,sp|Q96S38|KS6C1_HUMAN,sp|P55084|ECHB_HUMAN,sp|Q01814|AT2B2_HUMAN,sp|P04839|CY24B_HUMAN,sp|P41240|CSK_HUMAN,sp|P29401|TKT_HUMAN,sp|P31040|SDHA_HUMAN,sp|Q12931|TRAP1_HUMAN,sp|P00390|GSHR_HUMAN,sp|P16615|AT2A2_HUMAN,sp|Q02750|MP2K1_HUMAN,sp|Q4L235|ACSF…
GO:0005507	copper ion binding	4 of 206 in the list	6 of 386 in all the Protein	0.407963	sp|P12259|FA5_HUMAN,sp|P09172|DOPO_HUMAN,sp|P02768|ALBU_HUMAN,sp|P06727|APOA4_HUMAN
GO:0005520	insulin-like growth factor binding	4 of 206 in the list	6 of 386 in all the Protein	0.407963	sp|P17936|IBP3_HUMAN,sp|P06213|INSR_HUMAN,sp|P18065|IBP2_HUMAN,sp|P24592|IBP6_HUMAN
GO:0008238	exopeptidase activity	4 of 206 in the list	6 of 386 in all the Protein	0.407963	sp|Q96FW1|OTUB1_HUMAN,sp|P15169|CBPN_HUMAN,sp|Q13867|BLMH_HUMAN,sp|Q96IY4|CBPB2_HUMAN
GO:0015248	sterol transporter activity	4 of 206 in the list	6 of 386 in all the Protein	0.407963	sp|P02652|APOA2_HUMAN,sp|P04114|APOB_HUMAN,sp|P02647|APOA1_HUMAN,sp|P06727|APOA4_HUMAN
GO:0015399	primary active transmembrane transporter activity	4 of 206 in the list	6 of 386 in all the Protein	0.407963	sp|P06576|ATPB_HUMAN,sp|Q01814|AT2B2_HUMAN,sp|P54709|AT1B3_HUMAN,sp|P16615|AT2A2_HUMAN
GO:0015405	P-P-bond-hydrolysis-driven transmembrane transporter activity	4 of 206 in the list	6 of 386 in all the Protein	0.407963	sp|P06576|ATPB_HUMAN,sp|Q01814|AT2B2_HUMAN,sp|P54709|AT1B3_HUMAN,sp|P16615|AT2A2_HUMAN
GO:0015662	ATPase activity, coupled to transmembrane movement of ions, phosphorylative mechanism	4 of 206 in the list	6 of 386 in all the Protein	0.407963	sp|P06576|ATPB_HUMAN,sp|Q01814|AT2B2_HUMAN,sp|P54709|AT1B3_HUMAN,sp|P16615|AT2A2_HUMAN
GO:0016597	amino acid binding	4 of 206 in the list	6 of 386 in all the Protein	0.407963	sp|P15169|CBPN_HUMAN,sp|P07996|TSP1_HUMAN,sp|P00390|GSHR_HUMAN,sp|P22352|GPX3_HUMAN
GO:0016820	hydrolase activity, acting on acid anhydrides, catalyzing transmembrane movement of substances	4 of 206 in the list	6 of 386 in all the Protein	0.407963	sp|P06576|ATPB_HUMAN,sp|Q01814|AT2B2_HUMAN,sp|P54709|AT1B3_HUMAN,sp|P16615|AT2A2_HUMAN
GO:0017127	cholesterol transporter activity	4 of 206 in the list	6 of 386 in all the Protein	0.407963	sp|P02652|APOA2_HUMAN,sp|P04114|APOB_HUMAN,sp|P02647|APOA1_HUMAN,sp|P06727|APOA4_HUMAN
GO:0042623	ATPase activity, coupled	4 of 206 in the list	6 of 386 in all the Protein	0.407963	sp|P06576|ATPB_HUMAN,sp|Q01814|AT2B2_HUMAN,sp|P54709|AT1B3_HUMAN,sp|P16615|AT2A2_HUMAN
GO:0042625	ATPase activity, coupled to transmembrane movement of ions	4 of 206 in the list	6 of 386 in all the Protein	0.407963	sp|P06576|ATPB_HUMAN,sp|Q01814|AT2B2_HUMAN,sp|P54709|AT1B3_HUMAN,sp|P16615|AT2A2_HUMAN
GO:0042626	ATPase activity, coupled to transmembrane movement of substances	4 of 206 in the list	6 of 386 in all the Protein	0.407963	sp|P06576|ATPB_HUMAN,sp|Q01814|AT2B2_HUMAN,sp|P54709|AT1B3_HUMAN,sp|P16615|AT2A2_HUMAN
GO:0043492	ATPase activity, coupled to movement of substances	4 of 206 in the list	6 of 386 in all the Protein	0.407963	sp|P06576|ATPB_HUMAN,sp|Q01814|AT2B2_HUMAN,sp|P54709|AT1B3_HUMAN,sp|P16615|AT2A2_HUMAN
GO:0071813	lipoprotein particle binding	4 of 206 in the list	6 of 386 in all the Protein	0.407963	sp|P07996|TSP1_HUMAN,sp|P02652|APOA2_HUMAN,sp|P02647|APOA1_HUMAN,sp|P02741|CRP_HUMAN
GO:0071814	protein-lipid complex binding	4 of 206 in the list	6 of 386 in all the Protein	0.407963	sp|P07996|TSP1_HUMAN,sp|P02652|APOA2_HUMAN,sp|P02647|APOA1_HUMAN,sp|P02741|CRP_HUMAN
GO:0003823	antigen binding	10 of 206 in the list	17 of 386 in all the Protein	0.418178	sp|P01593|KVD33_HUMAN,sp|A0M8Q6|IGLC7_HUMAN,sp|P0DP09|KV113_HUMAN,sp|P04430|KV116_HUMAN,sp|P01871|IGHM_HUMAN,sp|P01591|IGJ_HUMAN,sp|P0CF74|IGLC6_HUMAN,sp|P01602|KV105_HUMAN,sp|P01859|IGHG2_HUMAN,sp|P0DOX3|IGD_HUMAN
GO:0001071	nucleic acid binding transcription factor activity	5 of 206 in the list	8 of 386 in all the Protein	0.438285	sp|Q06546|GABPA_HUMAN,sp|Q9H3D4|P63_HUMAN,sp|Q9P0K8|FOXJ2_HUMAN,sp|O75593|FOXH1_HUMAN,sp|P28347|TEAD1_HUMAN
GO:0003700	sequence-specific DNA binding transcription factor activity	5 of 206 in the list	8 of 386 in all the Protein	0.438285	sp|Q06546|GABPA_HUMAN,sp|Q9H3D4|P63_HUMAN,sp|Q9P0K8|FOXJ2_HUMAN,sp|O75593|FOXH1_HUMAN,sp|P28347|TEAD1_HUMAN
GO:0008324	cation transmembrane transporter activity	5 of 206 in the list	8 of 386 in all the Protein	0.438285	sp|P06576|ATPB_HUMAN,sp|Q01814|AT2B2_HUMAN,sp|O75964|ATP5L_HUMAN,sp|P54709|AT1B3_HUMAN,sp|P16615|AT2A2_HUMAN
GO:0030554	adenyl nucleotide binding	19 of 206 in the list	34 of 386 in all the Protein	0.450587	sp|P60709|ACTB_HUMAN,sp|Q15645|PCH2_HUMAN,sp|P06213|INSR_HUMAN,sp|P53778|MK12_HUMAN,sp|Q9H2X6|HIPK2_HUMAN,sp|Q96S38|KS6C1_HUMAN,sp|Q01814|AT2B2_HUMAN,sp|P41240|CSK_HUMAN,sp|P29401|TKT_HUMAN,sp|Q12931|TRAP1_HUMAN,sp|Q02750|MP2K1_HUMAN,sp|P16615|AT2A2_HUMAN,sp|Q4L235|ACSF4_HUMAN,sp|Q15772|SPEG_HUMAN,sp|A6NHR9|SMHD1_HUMAN,sp|P19367|HXK1_HUMAN,sp|P06576|ATPB_HUMAN,sp|Q8TF76|HASP_HUMAN,sp|P11021|GRP78…
GO:0032559	adenyl ribonucleotide binding	19 of 206 in the list	34 of 386 in all the Protein	0.450587	sp|P60709|ACTB_HUMAN,sp|Q15645|PCH2_HUMAN,sp|P06213|INSR_HUMAN,sp|P53778|MK12_HUMAN,sp|Q9H2X6|HIPK2_HUMAN,sp|Q96S38|KS6C1_HUMAN,sp|Q01814|AT2B2_HUMAN,sp|P41240|CSK_HUMAN,sp|P29401|TKT_HUMAN,sp|Q12931|TRAP1_HUMAN,sp|Q02750|MP2K1_HUMAN,sp|P16615|AT2A2_HUMAN,sp|Q4L235|ACSF4_HUMAN,sp|Q15772|SPEG_HUMAN,sp|A6NHR9|SMHD1_HUMAN,sp|P19367|HXK1_HUMAN,sp|P06576|ATPB_HUMAN,sp|Q8TF76|HASP_HUMAN,sp|P11021|GRP78…
GO:0000166	nucleotide binding	27 of 206 in the list	49 of 386 in all the Protein	0.458394	sp|P60709|ACTB_HUMAN,sp|Q15645|PCH2_HUMAN,sp|P06213|INSR_HUMAN,sp|O43837|IDH3B_HUMAN,sp|P53778|MK12_HUMAN,sp|Q9H2X6|HIPK2_HUMAN,sp|P50213|IDH3A_HUMAN,sp|Q96S38|KS6C1_HUMAN,sp|P55084|ECHB_HUMAN,sp|Q01814|AT2B2_HUMAN,sp|P04839|CY24B_HUMAN,sp|P41240|CSK_HUMAN,sp|P29401|TKT_HUMAN,sp|P31040|SDHA_HUMAN,sp|Q12931|TRAP1_HUMAN,sp|P00390|GSHR_HUMAN,sp|P16615|AT2A2_HUMAN,sp|Q02750|MP2K1_HUMAN,sp|Q4L235|ACSF…
GO:0035639	purine ribonucleoside triphosphate binding	21 of 206 in the list	38 of 386 in all the Protein	0.471235	sp|P60709|ACTB_HUMAN,sp|Q15645|PCH2_HUMAN,sp|P06213|INSR_HUMAN,sp|P53778|MK12_HUMAN,sp|Q9H2X6|HIPK2_HUMAN,sp|Q96S38|KS6C1_HUMAN,sp|Q01814|AT2B2_HUMAN,sp|P41240|CSK_HUMAN,sp|P29401|TKT_HUMAN,sp|Q12931|TRAP1_HUMAN,sp|Q02750|MP2K1_HUMAN,sp|P16615|AT2A2_HUMAN,sp|Q4L235|ACSF4_HUMAN,sp|A6NNZ2|TBB8L_HUMAN,sp|Q15772|SPEG_HUMAN,sp|P60900|PSA6_HUMAN,sp|A6NHR9|SMHD1_HUMAN,sp|P19367|HXK1_HUMAN,sp|P06576|ATPB…
GO:0005319	lipid transporter activity	7 of 206 in the list	12 of 386 in all the Protein	0.480243	sp|P02652|APOA2_HUMAN,sp|P05090|APOD_HUMAN,sp|P04114|APOB_HUMAN,sp|O95445|APOM_HUMAN,sp|P02647|APOA1_HUMAN,sp|P06727|APOA4_HUMAN,sp|Q02985|FHR3_HUMAN
GO:0016491	oxidoreductase activity	15 of 206 in the list	27 of 386 in all the Protein	0.487138	sp|P09172|DOPO_HUMAN,sp|O43837|IDH3B_HUMAN,sp|P22352|GPX3_HUMAN,sp|O00391|QSOX1_HUMAN,sp|P50213|IDH3A_HUMAN,sp|P00352|AL1A1_HUMAN,sp|P55084|ECHB_HUMAN,sp|P04839|CY24B_HUMAN,sp|P31040|SDHA_HUMAN,sp|P07237|PDIA1_HUMAN,sp|P68871|HBB_HUMAN,sp|P03952|KLKB1_HUMAN,sp|P00390|GSHR_HUMAN,sp|P04179|SODM_HUMAN,sp|P69905|HBA_HUMAN
GO:0004672	protein kinase activity	10 of 206 in the list	18 of 386 in all the Protein	0.522408	sp|P06213|INSR_HUMAN,sp|Q15772|SPEG_HUMAN,sp|P53778|MK12_HUMAN,sp|Q9H2X6|HIPK2_HUMAN,sp|Q96S38|KS6C1_HUMAN,sp|Q8TF76|HASP_HUMAN,sp|P41240|CSK_HUMAN,sp|Q9GZM3|RPB1B_HUMAN,sp|P29401|TKT_HUMAN,sp|Q02750|MP2K1_HUMAN
GO:0016773	phosphotransferase activity, alcohol group as acceptor	11 of 206 in the list	20 of 386 in all the Protein	0.533585	sp|P06213|INSR_HUMAN,sp|Q15772|SPEG_HUMAN,sp|P53778|MK12_HUMAN,sp|Q9H2X6|HIPK2_HUMAN,sp|Q96S38|KS6C1_HUMAN,sp|P19367|HXK1_HUMAN,sp|Q8TF76|HASP_HUMAN,sp|P41240|CSK_HUMAN,sp|Q9GZM3|RPB1B_HUMAN,sp|P29401|TKT_HUMAN,sp|Q02750|MP2K1_HUMAN
GO:0001883	purine nucleoside binding	20 of 206 in the list	37 of 386 in all the Protein	0.535179	sp|P60709|ACTB_HUMAN,sp|Q15645|PCH2_HUMAN,sp|P06213|INSR_HUMAN,sp|P53778|MK12_HUMAN,sp|Q9H2X6|HIPK2_HUMAN,sp|Q96S38|KS6C1_HUMAN,sp|Q01814|AT2B2_HUMAN,sp|P41240|CSK_HUMAN,sp|P29401|TKT_HUMAN,sp|Q12931|TRAP1_HUMAN,sp|Q02750|MP2K1_HUMAN,sp|P16615|AT2A2_HUMAN,sp|Q4L235|ACSF4_HUMAN,sp|A6NNZ2|TBB8L_HUMAN,sp|Q15772|SPEG_HUMAN,sp|A6NHR9|SMHD1_HUMAN,sp|P19367|HXK1_HUMAN,sp|P06576|ATPB_HUMAN,sp|Q8TF76|HASP…
GO:0032550	purine ribonucleoside binding	20 of 206 in the list	37 of 386 in all the Protein	0.535179	sp|P60709|ACTB_HUMAN,sp|Q15645|PCH2_HUMAN,sp|P06213|INSR_HUMAN,sp|P53778|MK12_HUMAN,sp|Q9H2X6|HIPK2_HUMAN,sp|Q96S38|KS6C1_HUMAN,sp|Q01814|AT2B2_HUMAN,sp|P41240|CSK_HUMAN,sp|P29401|TKT_HUMAN,sp|Q12931|TRAP1_HUMAN,sp|Q02750|MP2K1_HUMAN,sp|P16615|AT2A2_HUMAN,sp|Q4L235|ACSF4_HUMAN,sp|A6NNZ2|TBB8L_HUMAN,sp|Q15772|SPEG_HUMAN,sp|A6NHR9|SMHD1_HUMAN,sp|P19367|HXK1_HUMAN,sp|P06576|ATPB_HUMAN,sp|Q8TF76|HASP…
GO:0001530	lipopolysaccharide binding	2 of 206 in the list	3 of 386 in all the Protein	0.550573	sp|P25786|PSA1_HUMAN,sp|P28070|PSB4_HUMAN
GO:0003729	mRNA binding	2 of 206 in the list	3 of 386 in all the Protein	0.550573	sp|P62263|RS14_HUMAN,sp|P62277|RS13_HUMAN
GO:0004091	carboxylesterase activity	2 of 206 in the list	3 of 386 in all the Protein	0.550573	sp|Q6PIU2|NCEH1_HUMAN,sp|P10768|ESTD_HUMAN
GO:0004869	cysteine-type endopeptidase inhibitor activity	2 of 206 in the list	3 of 386 in all the Protein	0.550573	sp|P02765|FETUA_HUMAN,sp|P11021|GRP78_HUMAN
GO:0005083	small GTPase regulator activity	2 of 206 in the list	3 of 386 in all the Protein	0.550573	sp|P00352|AL1A1_HUMAN,sp|Q8IV61|GRP3_HUMAN
GO:0005096	GTPase activator activity	2 of 206 in the list	3 of 386 in all the Protein	0.550573	sp|P00352|AL1A1_HUMAN,sp|Q8IV61|GRP3_HUMAN
GO:0005388	calcium-transporting ATPase activity	2 of 206 in the list	3 of 386 in all the Protein	0.550573	sp|Q01814|AT2B2_HUMAN,sp|P16615|AT2A2_HUMAN
GO:0008565	protein transporter activity	2 of 206 in the list	3 of 386 in all the Protein	0.550573	sp|Q96JB2|COG3_HUMAN,sp|Q07954|LRP1_HUMAN
GO:0015085	calcium ion transmembrane transporter activity	2 of 206 in the list	3 of 386 in all the Protein	0.550573	sp|Q01814|AT2B2_HUMAN,sp|P16615|AT2A2_HUMAN
GO:0015103	inorganic anion transmembrane transporter activity	2 of 206 in the list	3 of 386 in all the Protein	0.550573	sp|O14791|APOL1_HUMAN,sp|Q00325|MPCP_HUMAN
GO:0019207	kinase regulator activity	2 of 206 in the list	3 of 386 in all the Protein	0.550573	sp|P02765|FETUA_HUMAN,sp|Q02750|MP2K1_HUMAN
GO:0019843	rRNA binding	2 of 206 in the list	3 of 386 in all the Protein	0.550573	sp|P62701|RS4X_HUMAN,sp|P32969|RL9_HUMAN
GO:0019887	protein kinase regulator activity	2 of 206 in the list	3 of 386 in all the Protein	0.550573	sp|P02765|FETUA_HUMAN,sp|Q02750|MP2K1_HUMAN
GO:0030165	PDZ domain binding	2 of 206 in the list	3 of 386 in all the Protein	0.550573	sp|Q01814|AT2B2_HUMAN,sp|O43424|GRID2_HUMAN
GO:0030169	low-density lipoprotein particle binding	2 of 206 in the list	3 of 386 in all the Protein	0.550573	sp|P07996|TSP1_HUMAN,sp|P02741|CRP_HUMAN
GO:0030492	hemoglobin binding	2 of 206 in the list	3 of 386 in all the Protein	0.550573	sp|P00739|HPTR_HUMAN,sp|P68871|HBB_HUMAN
GO:0030695	GTPase regulator activity	2 of 206 in the list	3 of 386 in all the Protein	0.550573	sp|P00352|AL1A1_HUMAN,sp|Q8IV61|GRP3_HUMAN
GO:0034185	apolipoprotein binding	2 of 206 in the list	3 of 386 in all the Protein	0.550573	sp|Q07954|LRP1_HUMAN,sp|P00747|PLMN_HUMAN
GO:0034190	apolipoprotein receptor binding	2 of 206 in the list	3 of 386 in all the Protein	0.550573	sp|P02652|APOA2_HUMAN,sp|P02647|APOA1_HUMAN
GO:0043236	laminin binding	2 of 206 in the list	3 of 386 in all the Protein	0.550573	sp|P07996|TSP1_HUMAN,sp|P14543|NID1_HUMAN
GO:0050840	extracellular matrix binding	2 of 206 in the list	3 of 386 in all the Protein	0.550573	sp|P07996|TSP1_HUMAN,sp|P14543|NID1_HUMAN
GO:0060589	nucleoside-triphosphatase regulator activity	2 of 206 in the list	3 of 386 in all the Protein	0.550573	sp|P00352|AL1A1_HUMAN,sp|Q8IV61|GRP3_HUMAN
GO:0070653	high-density lipoprotein particle receptor binding	2 of 206 in the list	3 of 386 in all the Protein	0.550573	sp|P02652|APOA2_HUMAN,sp|P02647|APOA1_HUMAN
GO:0072509	divalent inorganic cation transmembrane transporter activity	2 of 206 in the list	3 of 386 in all the Protein	0.550573	sp|Q01814|AT2B2_HUMAN,sp|P16615|AT2A2_HUMAN
GO:0043169	cation binding	57 of 206 in the list	107 of 386 in all the Protein	0.555138	sp|P17936|IBP3_HUMAN,sp|Q9NQ79|CRAC1_HUMAN,sp|P15169|CBPN_HUMAN,sp|P05452|TETN_HUMAN,sp|P35555|FBN1_HUMAN,sp|Q13813|SPTN1_HUMAN,sp|O43837|IDH3B_HUMAN,sp|P53778|MK12_HUMAN,sp|P06727|APOA4_HUMAN,sp|Q12841|FSTL1_HUMAN,sp|Q6PK81|ZN773_HUMAN,sp|P33151|CADH5_HUMAN,sp|P04839|CY24B_HUMAN,sp|Q07954|LRP1_HUMAN,sp|P29401|TKT_HUMAN,sp|Q7Z340|ZN551_HUMAN,sp|P03952|KLKB1_HUMAN,sp|P19022|CADH2_HUMAN,sp|Q14192|F…
GO:0000975	regulatory region DNA binding	3 of 206 in the list	5 of 386 in all the Protein	0.563284	sp|Q06546|GABPA_HUMAN,sp|Q9H3D4|P63_HUMAN,sp|O75593|FOXH1_HUMAN
GO:0001067	regulatory region nucleic acid binding	3 of 206 in the list	5 of 386 in all the Protein	0.563284	sp|Q06546|GABPA_HUMAN,sp|Q9H3D4|P63_HUMAN,sp|O75593|FOXH1_HUMAN
GO:0005057	receptor signaling protein activity	3 of 206 in the list	5 of 386 in all the Protein	0.563284	sp|P06213|INSR_HUMAN,sp|P53778|MK12_HUMAN,sp|Q02750|MP2K1_HUMAN
GO:0016667	oxidoreductase activity, acting on a sulfur group of donors	3 of 206 in the list	5 of 386 in all the Protein	0.563284	sp|O00391|QSOX1_HUMAN,sp|P07237|PDIA1_HUMAN,sp|P00390|GSHR_HUMAN
GO:0019955	cytokine binding	3 of 206 in the list	5 of 386 in all the Protein	0.563284	sp|P07996|TSP1_HUMAN,sp|Q9NZN1|IRPL1_HUMAN,sp|P01023|A2MG_HUMAN
GO:0031210	phosphatidylcholine binding	3 of 206 in the list	5 of 386 in all the Protein	0.563284	sp|P02652|APOA2_HUMAN,sp|P05154|IPSP_HUMAN,sp|P06727|APOA4_HUMAN
GO:0044212	transcription regulatory region DNA binding	3 of 206 in the list	5 of 386 in all the Protein	0.563284	sp|Q06546|GABPA_HUMAN,sp|Q9H3D4|P63_HUMAN,sp|O75593|FOXH1_HUMAN
GO:0046873	metal ion transmembrane transporter activity	3 of 206 in the list	5 of 386 in all the Protein	0.563284	sp|Q01814|AT2B2_HUMAN,sp|P54709|AT1B3_HUMAN,sp|P16615|AT2A2_HUMAN
GO:0060228	phosphatidylcholine-sterol O-acyltransferase activator activity	3 of 206 in the list	5 of 386 in all the Protein	0.563284	sp|P02652|APOA2_HUMAN,sp|P02647|APOA1_HUMAN,sp|P06727|APOA4_HUMAN
GO:0043167	ion binding	84 of 206 in the list	158 of 386 in all the Protein	0.5678	sp|P02776|PLF4_HUMAN,sp|P35555|FBN1_HUMAN,sp|Q13813|SPTN1_HUMAN,sp|O43837|IDH3B_HUMAN,sp|P53778|MK12_HUMAN,sp|P06727|APOA4_HUMAN,sp|Q9H2X6|HIPK2_HUMAN,sp|Q12841|FSTL1_HUMAN,sp|P33151|CADH5_HUMAN,sp|Q96S38|KS6C1_HUMAN,sp|P55084|ECHB_HUMAN,sp|Q07954|LRP1_HUMAN,sp|P29401|TKT_HUMAN,sp|P03952|KLKB1_HUMAN,sp|Q12931|TRAP1_HUMAN,sp|P19022|CADH2_HUMAN,sp|Q04721|NOTC2_HUMAN,sp|P04004|VTNC_HUMAN,sp|Q9H3D4|P…
GO:0004713	protein tyrosine kinase activity	4 of 206 in the list	7 of 386 in all the Protein	0.573912	sp|P06213|INSR_HUMAN,sp|P41240|CSK_HUMAN,sp|P29401|TKT_HUMAN,sp|Q02750|MP2K1_HUMAN
GO:0005506	iron ion binding	4 of 206 in the list	7 of 386 in all the Protein	0.573912	sp|P02042|HBD_HUMAN,sp|P03952|KLKB1_HUMAN,sp|P68871|HBB_HUMAN,sp|P69905|HBA_HUMAN
GO:0015485	cholesterol binding	4 of 206 in the list	7 of 386 in all the Protein	0.573912	sp|P02652|APOA2_HUMAN,sp|P05090|APOD_HUMAN,sp|P02647|APOA1_HUMAN,sp|P02741|CRP_HUMAN
GO:0032934	sterol binding	4 of 206 in the list	7 of 386 in all the Protein	0.573912	sp|P02652|APOA2_HUMAN,sp|P05090|APOD_HUMAN,sp|P02647|APOA1_HUMAN,sp|P02741|CRP_HUMAN
GO:0043565	sequence-specific DNA binding	4 of 206 in the list	7 of 386 in all the Protein	0.573912	sp|Q06546|GABPA_HUMAN,sp|Q9H3D4|P63_HUMAN,sp|Q9P0K8|FOXJ2_HUMAN,sp|O75593|FOXH1_HUMAN
GO:0050997	quaternary ammonium group binding	4 of 206 in the list	7 of 386 in all the Protein	0.573912	sp|P02652|APOA2_HUMAN,sp|P05154|IPSP_HUMAN,sp|P06727|APOA4_HUMAN,sp|P02741|CRP_HUMAN
GO:0070325	lipoprotein particle receptor binding	4 of 206 in the list	7 of 386 in all the Protein	0.573912	sp|P02652|APOA2_HUMAN,sp|Q07954|LRP1_HUMAN,sp|P04114|APOB_HUMAN,sp|P02647|APOA1_HUMAN
GO:0004888	transmembrane signaling receptor activity	5 of 206 in the list	9 of 386 in all the Protein	0.58324	sp|Q9NZN1|IRPL1_HUMAN,sp|P06213|INSR_HUMAN,sp|P29401|TKT_HUMAN,sp|O43424|GRID2_HUMAN,sp|Q9NYQ6|CELR1_HUMAN
GO:0022804	active transmembrane transporter activity	5 of 206 in the list	9 of 386 in all the Protein	0.58324	sp|P06576|ATPB_HUMAN,sp|Q01814|AT2B2_HUMAN,sp|P54709|AT1B3_HUMAN,sp|Q00325|MPCP_HUMAN,sp|P16615|AT2A2_HUMAN
GO:0004674	protein serine/threonine kinase activity	6 of 206 in the list	11 of 386 in all the Protein	0.591663	sp|Q96S38|KS6C1_HUMAN,sp|Q8TF76|HASP_HUMAN,sp|Q15772|SPEG_HUMAN,sp|P53778|MK12_HUMAN,sp|Q02750|MP2K1_HUMAN,sp|Q9H2X6|HIPK2_HUMAN
GO:0005496	steroid binding	6 of 206 in the list	11 of 386 in all the Protein	0.591663	sp|P00352|AL1A1_HUMAN,sp|P02652|APOA2_HUMAN,sp|P08185|CBG_HUMAN,sp|P05090|APOD_HUMAN,sp|P02647|APOA1_HUMAN,sp|P02741|CRP_HUMAN
GO:0017076	purine nucleotide binding	20 of 206 in the list	38 of 386 in all the Protein	0.606228	sp|P60709|ACTB_HUMAN,sp|Q15645|PCH2_HUMAN,sp|P06213|INSR_HUMAN,sp|P53778|MK12_HUMAN,sp|Q9H2X6|HIPK2_HUMAN,sp|Q96S38|KS6C1_HUMAN,sp|Q01814|AT2B2_HUMAN,sp|P41240|CSK_HUMAN,sp|P29401|TKT_HUMAN,sp|Q12931|TRAP1_HUMAN,sp|Q02750|MP2K1_HUMAN,sp|P16615|AT2A2_HUMAN,sp|Q4L235|ACSF4_HUMAN,sp|A6NNZ2|TBB8L_HUMAN,sp|Q15772|SPEG_HUMAN,sp|A6NHR9|SMHD1_HUMAN,sp|P19367|HXK1_HUMAN,sp|P06576|ATPB_HUMAN,sp|Q8TF76|HASP…
GO:0032549	ribonucleoside binding	20 of 206 in the list	38 of 386 in all the Protein	0.606228	sp|P60709|ACTB_HUMAN,sp|Q15645|PCH2_HUMAN,sp|P06213|INSR_HUMAN,sp|P53778|MK12_HUMAN,sp|Q9H2X6|HIPK2_HUMAN,sp|Q96S38|KS6C1_HUMAN,sp|Q01814|AT2B2_HUMAN,sp|P41240|CSK_HUMAN,sp|P29401|TKT_HUMAN,sp|Q12931|TRAP1_HUMAN,sp|Q02750|MP2K1_HUMAN,sp|P16615|AT2A2_HUMAN,sp|Q4L235|ACSF4_HUMAN,sp|A6NNZ2|TBB8L_HUMAN,sp|Q15772|SPEG_HUMAN,sp|A6NHR9|SMHD1_HUMAN,sp|P19367|HXK1_HUMAN,sp|P06576|ATPB_HUMAN,sp|Q8TF76|HASP…
GO:0032553	ribonucleotide binding	20 of 206 in the list	38 of 386 in all the Protein	0.606228	sp|P60709|ACTB_HUMAN,sp|Q15645|PCH2_HUMAN,sp|P06213|INSR_HUMAN,sp|P53778|MK12_HUMAN,sp|Q9H2X6|HIPK2_HUMAN,sp|Q96S38|KS6C1_HUMAN,sp|Q01814|AT2B2_HUMAN,sp|P41240|CSK_HUMAN,sp|P29401|TKT_HUMAN,sp|Q12931|TRAP1_HUMAN,sp|Q02750|MP2K1_HUMAN,sp|P16615|AT2A2_HUMAN,sp|Q4L235|ACSF4_HUMAN,sp|A6NNZ2|TBB8L_HUMAN,sp|Q15772|SPEG_HUMAN,sp|A6NHR9|SMHD1_HUMAN,sp|P19367|HXK1_HUMAN,sp|P06576|ATPB_HUMAN,sp|Q8TF76|HASP…
GO:0032555	purine ribonucleotide binding	20 of 206 in the list	38 of 386 in all the Protein	0.606228	sp|P60709|ACTB_HUMAN,sp|Q15645|PCH2_HUMAN,sp|P06213|INSR_HUMAN,sp|P53778|MK12_HUMAN,sp|Q9H2X6|HIPK2_HUMAN,sp|Q96S38|KS6C1_HUMAN,sp|Q01814|AT2B2_HUMAN,sp|P41240|CSK_HUMAN,sp|P29401|TKT_HUMAN,sp|Q12931|TRAP1_HUMAN,sp|Q02750|MP2K1_HUMAN,sp|P16615|AT2A2_HUMAN,sp|Q4L235|ACSF4_HUMAN,sp|A6NNZ2|TBB8L_HUMAN,sp|Q15772|SPEG_HUMAN,sp|A6NHR9|SMHD1_HUMAN,sp|P19367|HXK1_HUMAN,sp|P06576|ATPB_HUMAN,sp|Q8TF76|HASP…
GO:0008047	enzyme activator activity	8 of 206 in the list	15 of 386 in all the Protein	0.606625	sp|P17936|IBP3_HUMAN,sp|P00352|AL1A1_HUMAN,sp|P02652|APOA2_HUMAN,sp|P01019|ANGT_HUMAN,sp|Q8IV61|GRP3_HUMAN,sp|P02647|APOA1_HUMAN,sp|P06727|APOA4_HUMAN,sp|Q02750|MP2K1_HUMAN
GO:0046914	transition metal ion binding	16 of 206 in the list	31 of 386 in all the Protein	0.653283	sp|P15169|CBPN_HUMAN,sp|P06727|APOA4_HUMAN,sp|Q6PK81|ZN773_HUMAN,sp|Q86YE8|ZN573_HUMAN,sp|Q7Z340|ZN551_HUMAN,sp|P03952|KLKB1_HUMAN,sp|P04179|SODM_HUMAN,sp|P12259|FA5_HUMAN,sp|Q14192|FHL2_HUMAN,sp|P09172|DOPO_HUMAN,sp|P02768|ALBU_HUMAN,sp|P02042|HBD_HUMAN,sp|P68871|HBB_HUMAN,sp|Q96IY4|CBPB2_HUMAN,sp|Q6P9A3|ZN549_HUMAN,sp|P69905|HBA_HUMAN
GO:0001882	nucleoside binding	20 of 206 in the list	39 of 386 in all the Protein	0.672377	sp|P60709|ACTB_HUMAN,sp|Q15645|PCH2_HUMAN,sp|P06213|INSR_HUMAN,sp|P53778|MK12_HUMAN,sp|Q9H2X6|HIPK2_HUMAN,sp|Q96S38|KS6C1_HUMAN,sp|Q01814|AT2B2_HUMAN,sp|P41240|CSK_HUMAN,sp|P29401|TKT_HUMAN,sp|Q12931|TRAP1_HUMAN,sp|Q02750|MP2K1_HUMAN,sp|P16615|AT2A2_HUMAN,sp|Q4L235|ACSF4_HUMAN,sp|A6NNZ2|TBB8L_HUMAN,sp|Q15772|SPEG_HUMAN,sp|A6NHR9|SMHD1_HUMAN,sp|P19367|HXK1_HUMAN,sp|P06576|ATPB_HUMAN,sp|Q8TF76|HASP…
GO:0030246	carbohydrate binding	6 of 206 in the list	12 of 386 in all the Protein	0.703084	sp|P04075|ALDOA_HUMAN,sp|P29401|TKT_HUMAN,sp|P09172|DOPO_HUMAN,sp|O75882|ATRN_HUMAN,sp|P02743|SAMP_HUMAN,sp|A2VDF0|FUCM_HUMAN
GO:0043178	alcohol binding	6 of 206 in the list	12 of 386 in all the Protein	0.703084	sp|P02652|APOA2_HUMAN,sp|P05090|APOD_HUMAN,sp|P05154|IPSP_HUMAN,sp|P02647|APOA1_HUMAN,sp|P06727|APOA4_HUMAN,sp|P02741|CRP_HUMAN
GO:0016301	kinase activity	11 of 206 in the list	22 of 386 in all the Protein	0.708112	sp|P06213|INSR_HUMAN,sp|Q15772|SPEG_HUMAN,sp|P53778|MK12_HUMAN,sp|Q9H2X6|HIPK2_HUMAN,sp|Q96S38|KS6C1_HUMAN,sp|P19367|HXK1_HUMAN,sp|Q8TF76|HASP_HUMAN,sp|P41240|CSK_HUMAN,sp|Q9GZM3|RPB1B_HUMAN,sp|P29401|TKT_HUMAN,sp|Q02750|MP2K1_HUMAN
GO:0005488	binding	178 of 206 in the list	336 of 386 in all the Protein	0.708672	sp|P31146|COR1A_HUMAN,sp|P35555|FBN1_HUMAN,sp|Q13813|SPTN1_HUMAN,sp|O43837|IDH3B_HUMAN,sp|P01591|IGJ_HUMAN,sp|P53778|MK12_HUMAN,sp|Q9H2X6|HIPK2_HUMAN,sp|Q12841|FSTL1_HUMAN,sp|P33151|CADH5_HUMAN,sp|Q96S38|KS6C1_HUMAN,sp|Q9NZN1|IRPL1_HUMAN,sp|P29401|TKT_HUMAN,sp|Q9GZM3|RPB1B_HUMAN,sp|P03952|KLKB1_HUMAN,sp|Q12931|TRAP1_HUMAN,sp|Q86YC2|PALB2_HUMAN,sp|P00739|HPTR_HUMAN,sp|Q7L9B9|EEPD1_HUMAN,sp|Q04721|…
GO:0042277	peptide binding	4 of 206 in the list	8 of 386 in all the Protein	0.709538	sp|P06213|INSR_HUMAN,sp|P00390|GSHR_HUMAN,sp|P22352|GPX3_HUMAN,sp|P02647|APOA1_HUMAN
GO:0048029	monosaccharide binding	4 of 206 in the list	8 of 386 in all the Protein	0.709538	sp|P04075|ALDOA_HUMAN,sp|P29401|TKT_HUMAN,sp|P09172|DOPO_HUMAN,sp|A2VDF0|FUCM_HUMAN
GO:0004866	endopeptidase inhibitor activity	15 of 206 in the list	30 of 386 in all the Protein	0.718055	sp|Q14624|ITIH4_HUMAN,sp|P01023|A2MG_HUMAN,sp|P01024|CO3_HUMAN,sp|P01019|ANGT_HUMAN,sp|P05543|THBG_HUMAN,sp|P01031|CO5_HUMAN,sp|P19827|ITIH1_HUMAN,sp|P0C0L4|CO4A_HUMAN,sp|P02765|FETUA_HUMAN,sp|P07225|PROS_HUMAN,sp|P08185|CBG_HUMAN,sp|P11021|GRP78_HUMAN,sp|Q86U17|SPA11_HUMAN,sp|P05154|IPSP_HUMAN,sp|Q06033|ITIH3_HUMAN
GO:0030414	peptidase inhibitor activity	15 of 206 in the list	30 of 386 in all the Protein	0.718055	sp|Q14624|ITIH4_HUMAN,sp|P01023|A2MG_HUMAN,sp|P01024|CO3_HUMAN,sp|P01019|ANGT_HUMAN,sp|P05543|THBG_HUMAN,sp|P01031|CO5_HUMAN,sp|P19827|ITIH1_HUMAN,sp|P0C0L4|CO4A_HUMAN,sp|P02765|FETUA_HUMAN,sp|P07225|PROS_HUMAN,sp|P08185|CBG_HUMAN,sp|P11021|GRP78_HUMAN,sp|Q86U17|SPA11_HUMAN,sp|P05154|IPSP_HUMAN,sp|Q06033|ITIH3_HUMAN
GO:0061135	endopeptidase regulator activity	15 of 206 in the list	30 of 386 in all the Protein	0.718055	sp|Q14624|ITIH4_HUMAN,sp|P01023|A2MG_HUMAN,sp|P01024|CO3_HUMAN,sp|P01019|ANGT_HUMAN,sp|P05543|THBG_HUMAN,sp|P01031|CO5_HUMAN,sp|P19827|ITIH1_HUMAN,sp|P0C0L4|CO4A_HUMAN,sp|P02765|FETUA_HUMAN,sp|P07225|PROS_HUMAN,sp|P08185|CBG_HUMAN,sp|P11021|GRP78_HUMAN,sp|Q86U17|SPA11_HUMAN,sp|P05154|IPSP_HUMAN,sp|Q06033|ITIH3_HUMAN
GO:0005178	integrin binding	3 of 206 in the list	6 of 386 in all the Protein	0.718606	sp|P04004|VTNC_HUMAN,sp|P07996|TSP1_HUMAN,sp|P24821|TENA_HUMAN
GO:0005516	calmodulin binding	3 of 206 in the list	6 of 386 in all the Protein	0.718606	sp|Q8TC29|ENKUR_HUMAN,sp|Q01814|AT2B2_HUMAN,sp|Q13813|SPTN1_HUMAN
GO:0016746	transferase activity, transferring acyl groups	3 of 206 in the list	6 of 386 in all the Protein	0.718606	sp|Q5SQI0|ATAT_HUMAN,sp|P00488|F13A_HUMAN,sp|P55084|ECHB_HUMAN
GO:0030170	pyridoxal phosphate binding	3 of 206 in the list	6 of 386 in all the Protein	0.718606	sp|P17174|AATC_HUMAN,sp|P00505|AATM_HUMAN,sp|P02768|ALBU_HUMAN
GO:0031625	ubiquitin protein ligase binding	3 of 206 in the list	6 of 386 in all the Protein	0.718606	sp|Q96FW1|OTUB1_HUMAN,sp|P11021|GRP78_HUMAN,sp|P10909|CLUS_HUMAN
GO:0044389	small conjugating protein ligase binding	3 of 206 in the list	6 of 386 in all the Protein	0.718606	sp|Q96FW1|OTUB1_HUMAN,sp|P11021|GRP78_HUMAN,sp|P10909|CLUS_HUMAN
GO:0016787	hydrolase activity	46 of 206 in the list	90 of 386 in all the Protein	0.729541	sp|Q15645|PCH2_HUMAN,sp|P15169|CBPN_HUMAN,sp|P49720|PSB3_HUMAN,sp|P20618|PSB1_HUMAN,sp|P25786|PSA1_HUMAN,sp|P49721|PSB2_HUMAN,sp|P05156|CFAI_HUMAN,sp|P03952|KLKB1_HUMAN,sp|Q02750|MP2K1_HUMAN,sp|P00746|CFAD_HUMAN,sp|O75964|ATP5L_HUMAN,sp|A6NNZ2|TBB8L_HUMAN,sp|P00739|HPTR_HUMAN,sp|Q13867|BLMH_HUMAN,sp|Q9UI46|DNAI1_HUMAN,sp|P28065|PSB9_HUMAN,sp|O75038|PLCH2_HUMAN,sp|P05154|IPSP_HUMAN,sp|P10768|ESTD_…
GO:0004714	transmembrane receptor protein tyrosine kinase activity	2 of 206 in the list	4 of 386 in all the Protein	0.737335	sp|P06213|INSR_HUMAN,sp|P29401|TKT_HUMAN
GO:0005501	retinoid binding	2 of 206 in the list	4 of 386 in all the Protein	0.737335	sp|P07360|CO8G_HUMAN,sp|P05154|IPSP_HUMAN
GO:0008013	beta-catenin binding	2 of 206 in the list	4 of 386 in all the Protein	0.737335	sp|P33151|CADH5_HUMAN,sp|P19022|CADH2_HUMAN
GO:0008237	metallopeptidase activity	2 of 206 in the list	4 of 386 in all the Protein	0.737335	sp|P15169|CBPN_HUMAN,sp|Q96IY4|CBPB2_HUMAN
GO:0016747	transferase activity, transferring acyl groups other than amino-acyl groups	2 of 206 in the list	4 of 386 in all the Protein	0.737335	sp|Q5SQI0|ATAT_HUMAN,sp|P55084|ECHB_HUMAN
GO:0016860	intramolecular oxidoreductase activity	2 of 206 in the list	4 of 386 in all the Protein	0.737335	sp|P42126|ECI1_HUMAN,sp|P07237|PDIA1_HUMAN
GO:0019199	transmembrane receptor protein kinase activity	2 of 206 in the list	4 of 386 in all the Protein	0.737335	sp|P06213|INSR_HUMAN,sp|P29401|TKT_HUMAN
GO:0019840	isoprenoid binding	2 of 206 in the list	4 of 386 in all the Protein	0.737335	sp|P07360|CO8G_HUMAN,sp|P05154|IPSP_HUMAN
GO:0043394	proteoglycan binding	2 of 206 in the list	4 of 386 in all the Protein	0.737335	sp|P07996|TSP1_HUMAN,sp|P49747|COMP_HUMAN
GO:0051087	chaperone binding	2 of 206 in the list	4 of 386 in all the Protein	0.737335	sp|P11021|GRP78_HUMAN,sp|P02768|ALBU_HUMAN
GO:0005102	receptor binding	26 of 206 in the list	52 of 386 in all the Protein	0.749739	sp|P07996|TSP1_HUMAN,sp|P06213|INSR_HUMAN,sp|P02776|PLF4_HUMAN,sp|P01019|ANGT_HUMAN,sp|P04114|APOB_HUMAN,sp|P02647|APOA1_HUMAN,sp|P33151|CADH5_HUMAN,sp|Q9NZN1|IRPL1_HUMAN,sp|Q01814|AT2B2_HUMAN,sp|Q07954|LRP1_HUMAN,sp|Q12931|TRAP1_HUMAN,sp|P16615|AT2A2_HUMAN,sp|P02766|TTHY_HUMAN,sp|Q14192|FHL2_HUMAN,sp|Q14116|IL18_HUMAN,sp|P02652|APOA2_HUMAN,sp|Q15848|ADIPO_HUMAN,sp|P01024|CO3_HUMAN,sp|P24821|TENA…
GO:0043168	anion binding	41 of 206 in the list	81 of 386 in all the Protein	0.753064	sp|Q15645|PCH2_HUMAN,sp|P15169|CBPN_HUMAN,sp|P02776|PLF4_HUMAN,sp|P05452|TETN_HUMAN,sp|P53778|MK12_HUMAN,sp|Q9H2X6|HIPK2_HUMAN,sp|Q12841|FSTL1_HUMAN,sp|Q96S38|KS6C1_HUMAN,sp|P55084|ECHB_HUMAN,sp|P04839|CY24B_HUMAN,sp|P29401|TKT_HUMAN,sp|Q12931|TRAP1_HUMAN,sp|Q02750|MP2K1_HUMAN,sp|A6NNZ2|TBB8L_HUMAN,sp|P22352|GPX3_HUMAN,sp|P04004|VTNC_HUMAN,sp|P19367|HXK1_HUMAN,sp|P05154|IPSP_HUMAN,sp|P02768|ALBU_…
GO:0036094	small molecule binding	35 of 206 in the list	70 of 386 in all the Protein	0.77554	sp|Q15645|PCH2_HUMAN,sp|O43837|IDH3B_HUMAN,sp|P53778|MK12_HUMAN,sp|P06727|APOA4_HUMAN,sp|Q9H2X6|HIPK2_HUMAN,sp|Q96S38|KS6C1_HUMAN,sp|P07360|CO8G_HUMAN,sp|P55084|ECHB_HUMAN,sp|P04839|CY24B_HUMAN,sp|P05090|APOD_HUMAN,sp|P29401|TKT_HUMAN,sp|Q12931|TRAP1_HUMAN,sp|Q02750|MP2K1_HUMAN,sp|P02652|APOA2_HUMAN,sp|A6NNZ2|TBB8L_HUMAN,sp|P45880|VDAC2_HUMAN,sp|P19367|HXK1_HUMAN,sp|P05154|IPSP_HUMAN,sp|P60709|AC…
GO:0016772	transferase activity, transferring phosphorus-containing groups	11 of 206 in the list	23 of 386 in all the Protein	0.778031	sp|P06213|INSR_HUMAN,sp|Q15772|SPEG_HUMAN,sp|P53778|MK12_HUMAN,sp|Q9H2X6|HIPK2_HUMAN,sp|Q96S38|KS6C1_HUMAN,sp|P19367|HXK1_HUMAN,sp|Q8TF76|HASP_HUMAN,sp|P41240|CSK_HUMAN,sp|Q9GZM3|RPB1B_HUMAN,sp|P29401|TKT_HUMAN,sp|Q02750|MP2K1_HUMAN
GO:0061134	peptidase regulator activity	15 of 206 in the list	31 of 386 in all the Protein	0.778778	sp|Q14624|ITIH4_HUMAN,sp|P01023|A2MG_HUMAN,sp|P01024|CO3_HUMAN,sp|P01019|ANGT_HUMAN,sp|P05543|THBG_HUMAN,sp|P01031|CO5_HUMAN,sp|P19827|ITIH1_HUMAN,sp|P0C0L4|CO4A_HUMAN,sp|P02765|FETUA_HUMAN,sp|P07225|PROS_HUMAN,sp|P08185|CBG_HUMAN,sp|P11021|GRP78_HUMAN,sp|Q86U17|SPA11_HUMAN,sp|P05154|IPSP_HUMAN,sp|Q06033|ITIH3_HUMAN
GO:0004871	signal transducer activity	9 of 206 in the list	19 of 386 in all the Protein	0.780529	sp|P06213|INSR_HUMAN,sp|O43424|GRID2_HUMAN,sp|P53778|MK12_HUMAN,sp|Q9NZN1|IRPL1_HUMAN,sp|O75038|PLCH2_HUMAN,sp|P29401|TKT_HUMAN,sp|Q9NYQ6|CELR1_HUMAN,sp|Q8IV61|GRP3_HUMAN,sp|Q02750|MP2K1_HUMAN
GO:0060089	molecular transducer activity	9 of 206 in the list	19 of 386 in all the Protein	0.780529	sp|P06213|INSR_HUMAN,sp|O43424|GRID2_HUMAN,sp|P53778|MK12_HUMAN,sp|Q9NZN1|IRPL1_HUMAN,sp|O75038|PLCH2_HUMAN,sp|P29401|TKT_HUMAN,sp|Q9NYQ6|CELR1_HUMAN,sp|Q8IV61|GRP3_HUMAN,sp|Q02750|MP2K1_HUMAN
GO:0008270	zinc ion binding	8 of 206 in the list	17 of 386 in all the Protein	0.783007	sp|Q14192|FHL2_HUMAN,sp|P15169|CBPN_HUMAN,sp|Q6PK81|ZN773_HUMAN,sp|Q86YE8|ZN573_HUMAN,sp|Q7Z340|ZN551_HUMAN,sp|P02768|ALBU_HUMAN,sp|Q96IY4|CBPB2_HUMAN,sp|Q6P9A3|ZN549_HUMAN
GO:0042802	identical protein binding	20 of 206 in the list	41 of 386 in all the Protein	0.784941	sp|P60709|ACTB_HUMAN,sp|P31146|COR1A_HUMAN,sp|P07996|TSP1_HUMAN,sp|O14818|PSA7_HUMAN,sp|P07910|HNRPC_HUMAN,sp|P02647|APOA1_HUMAN,sp|P06727|APOA4_HUMAN,sp|P29401|TKT_HUMAN,sp|P00390|GSHR_HUMAN,sp|P04179|SODM_HUMAN,sp|Q14192|FHL2_HUMAN,sp|P02652|APOA2_HUMAN,sp|P04075|ALDOA_HUMAN,sp|Q15848|ADIPO_HUMAN,sp|P08670|VIME_HUMAN,sp|P42126|ECI1_HUMAN,sp|P13796|PLSL_HUMAN,sp|Q9H3D4|P63_HUMAN,sp|P02458|CO2A1_…
GO:0005200	structural constituent of cytoskeleton	6 of 206 in the list	13 of 386 in all the Protein	0.791948	sp|P60709|ACTB_HUMAN,sp|Q9Y490|TLN1_HUMAN,sp|P08670|VIME_HUMAN,sp|Q13813|SPTN1_HUMAN,sp|P02538|K2C6A_HUMAN,sp|P13647|K2C5_HUMAN
GO:0020037	heme binding	5 of 206 in the list	11 of 386 in all the Protein	0.799537	sp|P04839|CY24B_HUMAN,sp|P02042|HBD_HUMAN,sp|P03952|KLKB1_HUMAN,sp|P68871|HBB_HUMAN,sp|P69905|HBA_HUMAN
GO:0038023	signaling receptor activity	5 of 206 in the list	11 of 386 in all the Protein	0.799537	sp|Q9NZN1|IRPL1_HUMAN,sp|P06213|INSR_HUMAN,sp|P29401|TKT_HUMAN,sp|O43424|GRID2_HUMAN,sp|Q9NYQ6|CELR1_HUMAN
GO:0005515	protein binding	126 of 206 in the list	243 of 386 in all the Protein	0.811584	sp|P31146|COR1A_HUMAN,sp|P07910|HNRPC_HUMAN,sp|P02776|PLF4_HUMAN,sp|P20618|PSB1_HUMAN,sp|P35555|FBN1_HUMAN,sp|Q9NZV5|SELN_HUMAN,sp|Q13813|SPTN1_HUMAN,sp|P53778|MK12_HUMAN,sp|P06727|APOA4_HUMAN,sp|P02745|C1QA_HUMAN,sp|Q9H2X6|HIPK2_HUMAN,sp|P33151|CADH5_HUMAN,sp|Q96S38|KS6C1_HUMAN,sp|Q9NZN1|IRPL1_HUMAN,sp|P55084|ECHB_HUMAN,sp|Q07954|LRP1_HUMAN,sp|P29401|TKT_HUMAN,sp|P13987|CD59_HUMAN,sp|Q9GZM3|RPB1…
GO:0003824	catalytic activity	81 of 206 in the list	159 of 386 in all the Protein	0.816686	sp|P49720|PSB3_HUMAN,sp|P20618|PSB1_HUMAN,sp|O43837|IDH3B_HUMAN,sp|P53778|MK12_HUMAN,sp|Q9H2X6|HIPK2_HUMAN,sp|Q96S38|KS6C1_HUMAN,sp|P55084|ECHB_HUMAN,sp|P29401|TKT_HUMAN,sp|Q9GZM3|RPB1B_HUMAN,sp|P49721|PSB2_HUMAN,sp|P03952|KLKB1_HUMAN,sp|P07237|PDIA1_HUMAN,sp|P00746|CFAD_HUMAN,sp|P00739|HPTR_HUMAN,sp|Q9UI46|DNAI1_HUMAN,sp|P00488|F13A_HUMAN,sp|P05154|IPSP_HUMAN,sp|P10768|ESTD_HUMAN,sp|P28074|PSB5_…
GO:0004601	peroxidase activity	3 of 206 in the list	7 of 386 in all the Protein	0.827126	sp|P68871|HBB_HUMAN,sp|P69905|HBA_HUMAN,sp|P22352|GPX3_HUMAN
GO:0016684	oxidoreductase activity, acting on peroxide as acceptor	3 of 206 in the list	7 of 386 in all the Protein	0.827126	sp|P68871|HBB_HUMAN,sp|P69905|HBA_HUMAN,sp|P22352|GPX3_HUMAN
GO:0016829	lyase activity	3 of 206 in the list	7 of 386 in all the Protein	0.827126	sp|P17174|AATC_HUMAN,sp|P04075|ALDOA_HUMAN,sp|P55084|ECHB_HUMAN
GO:0033293	monocarboxylic acid binding	3 of 206 in the list	7 of 386 in all the Protein	0.827126	sp|P06213|INSR_HUMAN,sp|P05154|IPSP_HUMAN,sp|P02768|ALBU_HUMAN
GO:0046983	protein dimerization activity	14 of 206 in the list	30 of 386 in all the Protein	0.830647	sp|Q06546|GABPA_HUMAN,sp|P0C0S5|H2AZ_HUMAN,sp|P31146|COR1A_HUMAN,sp|P02652|APOA2_HUMAN,sp|Q15848|ADIPO_HUMAN,sp|Q13813|SPTN1_HUMAN,sp|P04114|APOB_HUMAN,sp|P06727|APOA4_HUMAN,sp|P04839|CY24B_HUMAN,sp|P29401|TKT_HUMAN,sp|Q9NYQ6|CELR1_HUMAN,sp|P07237|PDIA1_HUMAN,sp|P00390|GSHR_HUMAN,sp|P02741|CRP_HUMAN
GO:0032403	protein complex binding	7 of 206 in the list	16 of 386 in all the Protein	0.851587	sp|P04004|VTNC_HUMAN,sp|Q9Y490|TLN1_HUMAN,sp|P07996|TSP1_HUMAN,sp|P06213|INSR_HUMAN,sp|Q07954|LRP1_HUMAN,sp|P12318|FCG2A_HUMAN,sp|P24821|TENA_HUMAN
GO:0043498	cell surface binding	7 of 206 in the list	16 of 386 in all the Protein	0.851587	sp|P07996|TSP1_HUMAN,sp|P06576|ATPB_HUMAN,sp|Q15848|ADIPO_HUMAN,sp|P00747|PLMN_HUMAN,sp|P02768|ALBU_HUMAN,sp|P06727|APOA4_HUMAN,sp|P02741|CRP_HUMAN
GO:0005504	fatty acid binding	2 of 206 in the list	5 of 386 in all the Protein	0.853369	sp|P06213|INSR_HUMAN,sp|P02768|ALBU_HUMAN
GO:0005525	GTP binding	2 of 206 in the list	5 of 386 in all the Protein	0.853369	sp|P06213|INSR_HUMAN,sp|A6NNZ2|TBB8L_HUMAN
GO:0008083	growth factor activity	2 of 206 in the list	5 of 386 in all the Protein	0.853369	sp|P01019|ANGT_HUMAN,sp|P02775|CXCL7_HUMAN
GO:0016810	hydrolase activity, acting on carbon-nitrogen (but not peptide) bonds	2 of 206 in the list	5 of 386 in all the Protein	0.853369	sp|Q9BSE5|SPEB_HUMAN,sp|P43251|BTD_HUMAN
GO:0016830	carbon-carbon lyase activity	2 of 206 in the list	5 of 386 in all the Protein	0.853369	sp|P17174|AATC_HUMAN,sp|P04075|ALDOA_HUMAN
GO:0016874	ligase activity	2 of 206 in the list	5 of 386 in all the Protein	0.853369	sp|Q4L235|ACSF4_HUMAN,sp|P43251|BTD_HUMAN
GO:0030234	enzyme regulator activity	22 of 206 in the list	47 of 386 in all the Protein	0.868127	sp|P17936|IBP3_HUMAN,sp|Q14624|ITIH4_HUMAN,sp|P01019|ANGT_HUMAN,sp|P05543|THBG_HUMAN,sp|P02647|APOA1_HUMAN,sp|P06727|APOA4_HUMAN,sp|P19827|ITIH1_HUMAN,sp|P0C0L4|CO4A_HUMAN,sp|P02765|FETUA_HUMAN,sp|P00352|AL1A1_HUMAN,sp|P08185|CBG_HUMAN,sp|P07225|PROS_HUMAN,sp|Q86U17|SPA11_HUMAN,sp|Q8IV61|GRP3_HUMAN,sp|Q02750|MP2K1_HUMAN,sp|P02652|APOA2_HUMAN,sp|P01024|CO3_HUMAN,sp|P01023|A2MG_HUMAN,sp|P01031|CO5_…
GO:0046906	tetrapyrrole binding	5 of 206 in the list	12 of 386 in all the Protein	0.868433	sp|P04839|CY24B_HUMAN,sp|P02042|HBD_HUMAN,sp|P03952|KLKB1_HUMAN,sp|P68871|HBB_HUMAN,sp|P69905|HBA_HUMAN
GO:0016740	transferase activity	18 of 206 in the list	39 of 386 in all the Protein	0.868947	sp|P06213|INSR_HUMAN,sp|P01019|ANGT_HUMAN,sp|P53778|MK12_HUMAN,sp|Q9H2X6|HIPK2_HUMAN,sp|Q96S38|KS6C1_HUMAN,sp|P55084|ECHB_HUMAN,sp|P41240|CSK_HUMAN,sp|P29401|TKT_HUMAN,sp|Q9GZM3|RPB1B_HUMAN,sp|Q9H3R1|NDST4_HUMAN,sp|Q02750|MP2K1_HUMAN,sp|P17174|AATC_HUMAN,sp|Q15772|SPEG_HUMAN,sp|Q5SQI0|ATAT_HUMAN,sp|P19367|HXK1_HUMAN,sp|Q8TF76|HASP_HUMAN,sp|P00488|F13A_HUMAN,sp|P00505|AATM_HUMAN
GO:0019899	enzyme binding	18 of 206 in the list	39 of 386 in all the Protein	0.868947	sp|P60709|ACTB_HUMAN,sp|P06213|INSR_HUMAN,sp|P04114|APOB_HUMAN,sp|P02647|APOA1_HUMAN,sp|P33151|CADH5_HUMAN,sp|P41240|CSK_HUMAN,sp|Q8IV61|GRP3_HUMAN,sp|Q02750|MP2K1_HUMAN,sp|P19022|CADH2_HUMAN,sp|Q96FW1|OTUB1_HUMAN,sp|P08670|VIME_HUMAN,sp|P01023|A2MG_HUMAN,sp|Q8TD16|BICD2_HUMAN,sp|P05154|IPSP_HUMAN,sp|Q9UM47|NOTC3_HUMAN,sp|P11021|GRP78_HUMAN,sp|P02768|ALBU_HUMAN,sp|P10909|CLUS_HUMAN
GO:0004857	enzyme inhibitor activity	16 of 206 in the list	35 of 386 in all the Protein	0.870581	sp|P02652|APOA2_HUMAN,sp|Q14624|ITIH4_HUMAN,sp|P01023|A2MG_HUMAN,sp|P01024|CO3_HUMAN,sp|P01019|ANGT_HUMAN,sp|P05543|THBG_HUMAN,sp|P01031|CO5_HUMAN,sp|P19827|ITIH1_HUMAN,sp|P0C0L4|CO4A_HUMAN,sp|P02765|FETUA_HUMAN,sp|P08185|CBG_HUMAN,sp|P07225|PROS_HUMAN,sp|P11021|GRP78_HUMAN,sp|Q86U17|SPA11_HUMAN,sp|P05154|IPSP_HUMAN,sp|Q06033|ITIH3_HUMAN
GO:1901681	sulfur compound binding	13 of 206 in the list	29 of 386 in all the Protein	0.875294	sp|P07996|TSP1_HUMAN,sp|P06213|INSR_HUMAN,sp|P02776|PLF4_HUMAN,sp|P05452|TETN_HUMAN,sp|P04114|APOB_HUMAN,sp|P22352|GPX3_HUMAN,sp|Q12841|FSTL1_HUMAN,sp|P04004|VTNC_HUMAN,sp|P49747|COMP_HUMAN,sp|P29401|TKT_HUMAN,sp|P05154|IPSP_HUMAN,sp|Q13753|LAMC2_HUMAN,sp|P00390|GSHR_HUMAN
GO:0033218	amide binding	4 of 206 in the list	10 of 386 in all the Protein	0.880928	sp|P06213|INSR_HUMAN,sp|P00390|GSHR_HUMAN,sp|P22352|GPX3_HUMAN,sp|P02647|APOA1_HUMAN
GO:0043499	eukaryotic cell surface binding	4 of 206 in the list	10 of 386 in all the Protein	0.880928	sp|P07996|TSP1_HUMAN,sp|P06576|ATPB_HUMAN,sp|Q15848|ADIPO_HUMAN,sp|P06727|APOA4_HUMAN
GO:0004867	serine-type endopeptidase inhibitor activity	9 of 206 in the list	21 of 386 in all the Protein	0.888297	sp|Q14624|ITIH4_HUMAN,sp|P01023|A2MG_HUMAN,sp|P01019|ANGT_HUMAN,sp|P05543|THBG_HUMAN,sp|P19827|ITIH1_HUMAN,sp|P08185|CBG_HUMAN,sp|Q86U17|SPA11_HUMAN,sp|P05154|IPSP_HUMAN,sp|Q06033|ITIH3_HUMAN
GO:0004252	serine-type endopeptidase activity	8 of 206 in the list	19 of 386 in all the Protein	0.89341	sp|P00736|C1R_HUMAN,sp|P00746|CFAD_HUMAN,sp|P00742|FA10_HUMAN,sp|P00739|HPTR_HUMAN,sp|P09871|C1S_HUMAN,sp|P05156|CFAI_HUMAN,sp|P00747|PLMN_HUMAN,sp|P03952|KLKB1_HUMAN
GO:0019842	vitamin binding	3 of 206 in the list	8 of 386 in all the Protein	0.897678	sp|P07360|CO8G_HUMAN,sp|P29401|TKT_HUMAN,sp|P09172|DOPO_HUMAN
GO:0001948	glycoprotein binding	2 of 206 in the list	6 of 386 in all the Protein	0.920751	sp|P07996|TSP1_HUMAN,sp|P49747|COMP_HUMAN
GO:0016651	oxidoreductase activity, acting on NAD(P)H	2 of 206 in the list	6 of 386 in all the Protein	0.920751	sp|P04839|CY24B_HUMAN,sp|P00390|GSHR_HUMAN
GO:0019001	guanyl nucleotide binding	2 of 206 in the list	6 of 386 in all the Protein	0.920751	sp|P06213|INSR_HUMAN,sp|A6NNZ2|TBB8L_HUMAN
GO:0032561	guanyl ribonucleotide binding	2 of 206 in the list	6 of 386 in all the Protein	0.920751	sp|P06213|INSR_HUMAN,sp|A6NNZ2|TBB8L_HUMAN
GO:0051015	actin filament binding	2 of 206 in the list	6 of 386 in all the Protein	0.920751	sp|P31146|COR1A_HUMAN,sp|P13796|PLSL_HUMAN
GO:0052689	carboxylic ester hydrolase activity	2 of 206 in the list	6 of 386 in all the Protein	0.920751	sp|Q6PIU2|NCEH1_HUMAN,sp|P10768|ESTD_HUMAN
GO:0005198	structural molecule activity	18 of 206 in the list	41 of 386 in all the Protein	0.926467	sp|P60709|ACTB_HUMAN,sp|P62277|RS13_HUMAN,sp|P35555|FBN1_HUMAN,sp|Q13813|SPTN1_HUMAN,sp|P13645|K1C10_HUMAN,sp|P49747|COMP_HUMAN,sp|P08729|K2C7_HUMAN,sp|P08670|VIME_HUMAN,sp|P46779|RL28_HUMAN,sp|P62701|RS4X_HUMAN,sp|A6NNZ2|TBB8L_HUMAN,sp|P13647|K2C5_HUMAN,sp|P02538|K2C6A_HUMAN,sp|P62263|RS14_HUMAN,sp|Q9Y490|TLN1_HUMAN,sp|Q16787|LAMA3_HUMAN,sp|P02458|CO2A1_HUMAN,sp|P32969|RL9_HUMAN
GO:0008236	serine-type peptidase activity	8 of 206 in the list	20 of 386 in all the Protein	0.928064	sp|P00736|C1R_HUMAN,sp|P00746|CFAD_HUMAN,sp|P00742|FA10_HUMAN,sp|P00739|HPTR_HUMAN,sp|P09871|C1S_HUMAN,sp|P05156|CFAI_HUMAN,sp|P00747|PLMN_HUMAN,sp|P03952|KLKB1_HUMAN
GO:0017171	serine hydrolase activity	8 of 206 in the list	20 of 386 in all the Protein	0.928064	sp|P00736|C1R_HUMAN,sp|P00746|CFAD_HUMAN,sp|P00742|FA10_HUMAN,sp|P00739|HPTR_HUMAN,sp|P09871|C1S_HUMAN,sp|P05156|CFAI_HUMAN,sp|P00747|PLMN_HUMAN,sp|P03952|KLKB1_HUMAN
GO:0008201	heparin binding	9 of 206 in the list	23 of 386 in all the Protein	0.948268	sp|P07996|TSP1_HUMAN,sp|P02776|PLF4_HUMAN,sp|P05452|TETN_HUMAN,sp|P04114|APOB_HUMAN,sp|Q12841|FSTL1_HUMAN,sp|P04004|VTNC_HUMAN,sp|P49747|COMP_HUMAN,sp|P05154|IPSP_HUMAN,sp|Q13753|LAMC2_HUMAN
GO:0097367	carbohydrate derivative binding	10 of 206 in the list	26 of 386 in all the Protein	0.962729	sp|P07996|TSP1_HUMAN,sp|P02776|PLF4_HUMAN,sp|P05452|TETN_HUMAN,sp|Q15848|ADIPO_HUMAN,sp|P04114|APOB_HUMAN,sp|Q12841|FSTL1_HUMAN,sp|P04004|VTNC_HUMAN,sp|P49747|COMP_HUMAN,sp|P05154|IPSP_HUMAN,sp|Q13753|LAMC2_HUMAN
GO:0005539	glycosaminoglycan binding	9 of 206 in the list	24 of 386 in all the Protein	0.965884	sp|P07996|TSP1_HUMAN,sp|P02776|PLF4_HUMAN,sp|P05452|TETN_HUMAN,sp|P04114|APOB_HUMAN,sp|Q12841|FSTL1_HUMAN,sp|P04004|VTNC_HUMAN,sp|P49747|COMP_HUMAN,sp|P05154|IPSP_HUMAN,sp|Q13753|LAMC2_HUMAN
GO:0005201	extracellular matrix structural constituent	3 of 206 in the list	10 of 386 in all the Protein	0.967073	sp|P49747|COMP_HUMAN,sp|P35555|FBN1_HUMAN,sp|P02458|CO2A1_HUMAN
GO:0042803	protein homodimerization activity	7 of 206 in the list	21 of 386 in all the Protein	0.98334	sp|P31146|COR1A_HUMAN,sp|P02652|APOA2_HUMAN,sp|Q15848|ADIPO_HUMAN,sp|P29401|TKT_HUMAN,sp|P00390|GSHR_HUMAN,sp|P06727|APOA4_HUMAN,sp|P02741|CRP_HUMAN
GO:0042578	phosphoric ester hydrolase activity	2 of 206 in the list	9 of 386 in all the Protein	0.988989	sp|O75038|PLCH2_HUMAN,sp|Q02750|MP2K1_HUMAN
GO:0003779	actin binding	5 of 206 in the list	18 of 386 in all the Protein	0.99381	sp|Q9Y490|TLN1_HUMAN,sp|P31146|COR1A_HUMAN,sp|P04075|ALDOA_HUMAN,sp|Q13813|SPTN1_HUMAN,sp|P13796|PLSL_HUMAN
GO:0016788	hydrolase activity, acting on ester bonds	4 of 206 in the list	16 of 386 in all the Protein	0.995653	sp|Q6PIU2|NCEH1_HUMAN,sp|O75038|PLCH2_HUMAN,sp|P10768|ESTD_HUMAN,sp|Q02750|MP2K1_HUMAN
GO:0008092	cytoskeletal protein binding	6 of 206 in the list	24 of 386 in all the Protein	0.999151	sp|P60709|ACTB_HUMAN,sp|Q9Y490|TLN1_HUMAN,sp|P31146|COR1A_HUMAN,sp|P04075|ALDOA_HUMAN,sp|Q13813|SPTN1_HUMAN,sp|P13796|PLSL_HUMAN
